# Supplementary material for: Composition-driven archetype dynamics in polyoxovanadates
Source: PubMed Central journal article supplement (PMC9159092; doi:10.1039/d2sc01004f), 2022-04-29
Supplement: SC-013-D2SC01004F-s001.pdf [file SC-013-D2SC01004F-s001.pdf]

## Supporting Information

# Composition-driven Archetype Dynamics in Polyoxovanadates

Aleksandar Kondinski,<sup>a\*</sup> Maren Rasmussen,<sup>b</sup> Sebastian Mangelsen,<sup>b</sup> Nicole Pienack,<sup>b</sup> Viktor Simjanoski,<sup>c</sup>  
Christian Näther,<sup>b</sup> Daniel L. Stares,<sup>d</sup> Christoph A. Schalley,<sup>d\*</sup> Wolfgang Bensch<sup>b\*</sup>

- a) Department of Chemical Engineering and Biotechnology, University of Cambridge, Philippa Fawcett Drive S, CB3 0AS, United Kingdom. E-mail: [aleksandar@kondinski.com](mailto:aleksandar@kondinski.com)
- b) Institut für Anorganische Chemie, Christian-Albrechts-Universität zu Kiel, 24118 Kiel, Germany. E-mail: [wbensch@ac.uni-kiel.de](mailto:wbensch@ac.uni-kiel.de)
- c) Primer affiliate of University of Chicago Master Program, Chicago, IL, United States.
- d) Institut für Chemie und Biochemie der Freien Universität, Arnimallee 20, 14195 Berlin, Germany. E-mail: [c.schalley@fu-berlin.de](mailto:c.schalley@fu-berlin.de)

## Chemical Characterisation

The X-ray powder diffraction pattern of  $[\text{Ni}(\text{en})_3]_2[\text{V}_6\text{As}_8\text{O}_{26}]$  was collected with a STOE Stadi P diffractometer (STOE & Cie) equipped with a MYTHEN 1 K detector (DECTRIS) using germanium monochromatized  $\text{Cu-K}_{\alpha 1}$  radiation ( $\lambda = 1.540598 \text{ \AA}$ ). The experimental and the calculated patterns of I are displayed in Figure S2 demonstrating phase purity of the reaction product.

Energy dispersive X-ray spectroscopy (EDX) analyses were performed with a Philips environmental scanning electron microscope ESEM XL30 equipped with an EDX detector. Experimental data for the Ni:As:V ratio = 1.96 : 7.88 : 6.02.

CHN elemental analyses were done with a “vario MICRO Cube” instrument (Elementar Analysensysteme GmbH). Experimental data/expected data in %: N 9.21/9.34; C 8.04/8.01; H 2.81/2.69.

UV/Vis measurements were done on a two-channel Cary 5 spectrometer (Varian Techtron Pty., Darmstadt, 200–3000  $\text{cm}^{-1}$ ). The solid material was ground with  $\text{BaSO}_4$  as white standard and the data are presented as Kubelka-Munk relation for diffuse reflectance data (Figure S3). Aqueous solutions (5 mL) at different concentrations were measured in quartz cuvettes and the maximum solubility was determined using the intense absorption at 610 nm (Figure S4).

The IR spectrum was recorded using an ATI Mattson Genesis Series FTIR Spectrometer, control software: WINFIRST, from ATI Mattson (Figure S5).

The long-term stability experiments were carried out with the synthesis workstation EasyMax® 102 (Mettler Toledo). Several sensors/electrodes were adapted by using a universal control box (UCB). The operation was done by the iControl EasyMax® software (Mettler Toledo). For the experiment, 594.5 mg  $[\text{Ni}(\text{en})_3]_2[\text{V}_6\text{As}_8\text{O}_{26}]$  were dissolved in 40 mL bi dest. water ( $\cong 14.86 \text{ g/L} \cong 8.26 \text{ mmol/L}$ ) in a 50 mL glass reactor at  $T = 25 \text{ }^\circ\text{C}$ , stirred with  $r = 500 \text{ rpm}$  and equipped with pH electrodes and conductivity sensor. The temperature was kept at  $25^\circ\text{C}$  for twelve days monitoring the changes in pH value and ionic conductivity. The pH sensors (InLab 1022 resp. Semi Micro L, Mettler Toledo) are combined pH electrodes with the following data: pH range 1-14, temperature range 0-80 $^\circ\text{C}$  resp. 0-100 $^\circ\text{C}$ , ARGENTHAL™ reference system, ceramic reference diaphragm, 3 mol/L KCl reference electrolyte. The ionic conductivity sensor (LTG Zelle, Sensortechnik Meinsberg, Xylem Analytics) is a conductivity cell for measurements in ionic mediums with 2-electrode technology, platinum electrodes (3-4 mm with a distance of 2 mm) and integrated temperature sensor (cell constant 1  $\text{cm}^{-1}$ ).

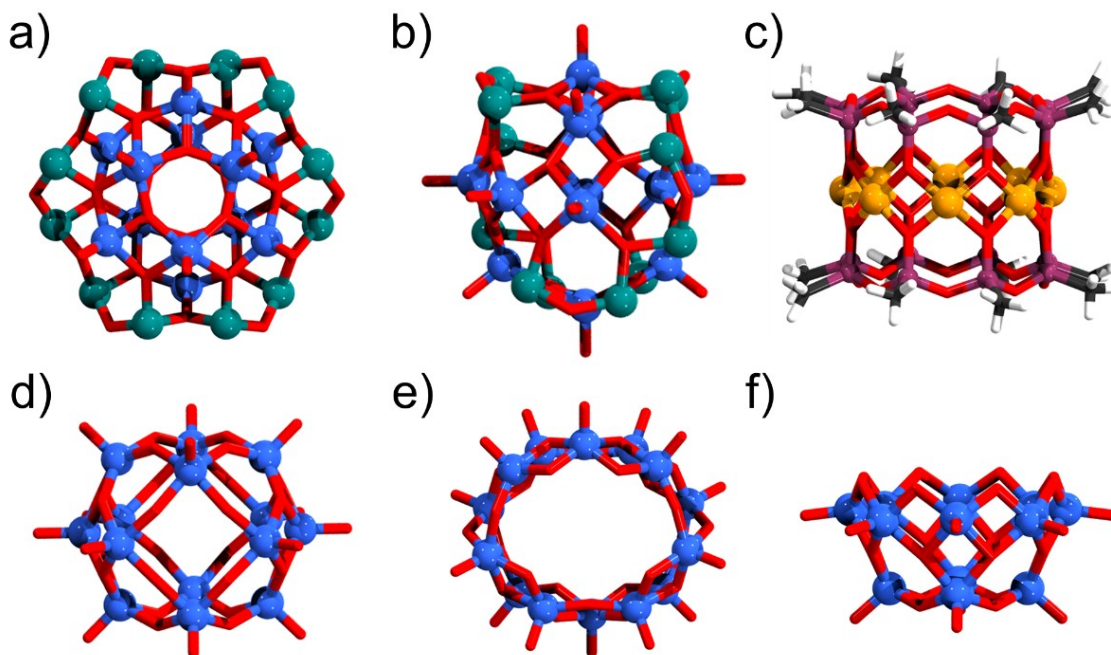

**Figure S1:** Ball and stick representation of: a)  $D_{3d}$  symmetric  $[V_{12}O_{36}(As_2O)_6]$  b)  $D_2$  symmetric  $[V_{12}O_{36}(As_2O)_6]$ ; e) cyclic  $\{Cu_8O_{16}(CH_3SiO)_8\}$ ; d) unsaturated kegginoidal  $\{V_{14}O_{38}\}$ . e) tubular  $\{V_{14}O_{32}\}$ ; f)  $[V_{12}O_{32}]^{4-}$  bowl. Colour code: V = blue, Cu = orange, As = green, O = red, Si = magenta, C = black and H = white.

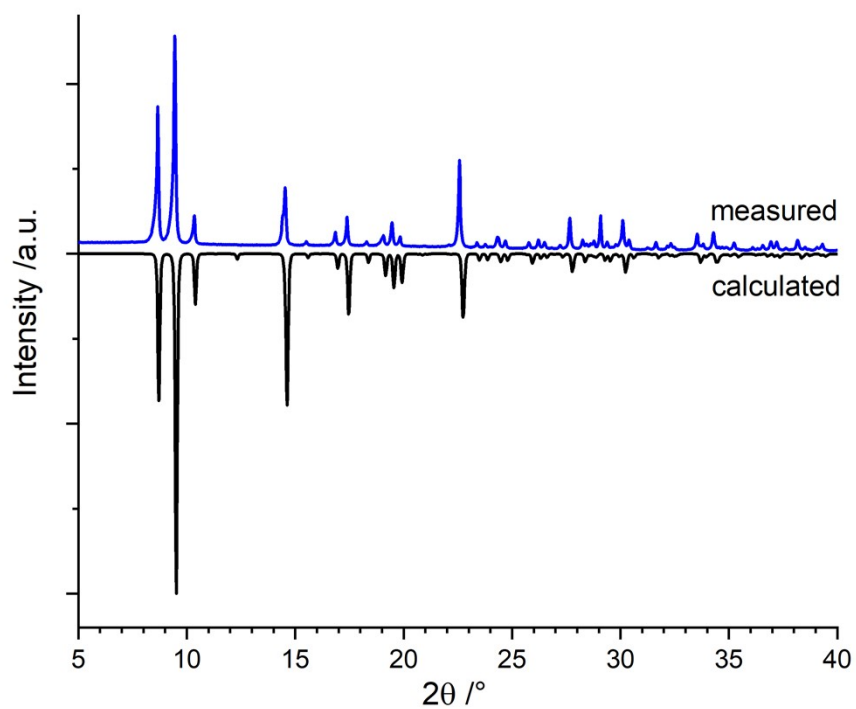

**Figure S2:** Comparison of the measured and calculated X-ray powder patterns of  $[Ni(en)_3]_2[V_6As_8O_{26}]$ .

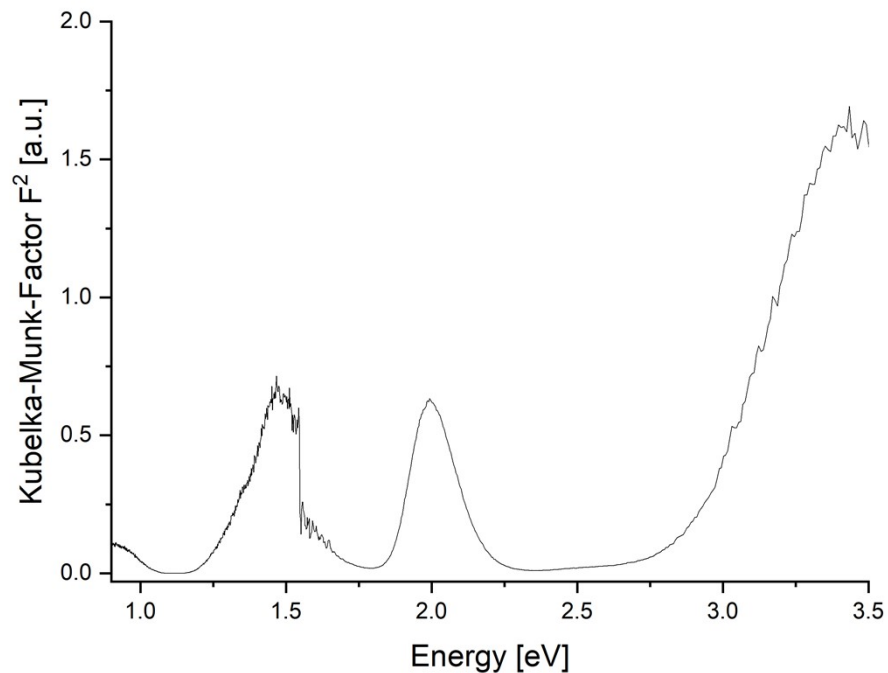

**Figure S3:** UV-Vis spectrum of  $[\text{Ni}(\text{en})_3]_2[\text{V}_6\text{As}_8\text{O}_{26}]$  shown as Kubelka-Munk plot. First absorption at ca. 1.45 eV ( $11700 \text{ cm}^{-1}$ , 855 nm), second at 2 eV ( $16130 \text{ cm}^{-1}$ , 620 nm). The intense absorption above 3 eV is caused by a charge-transfer transition.

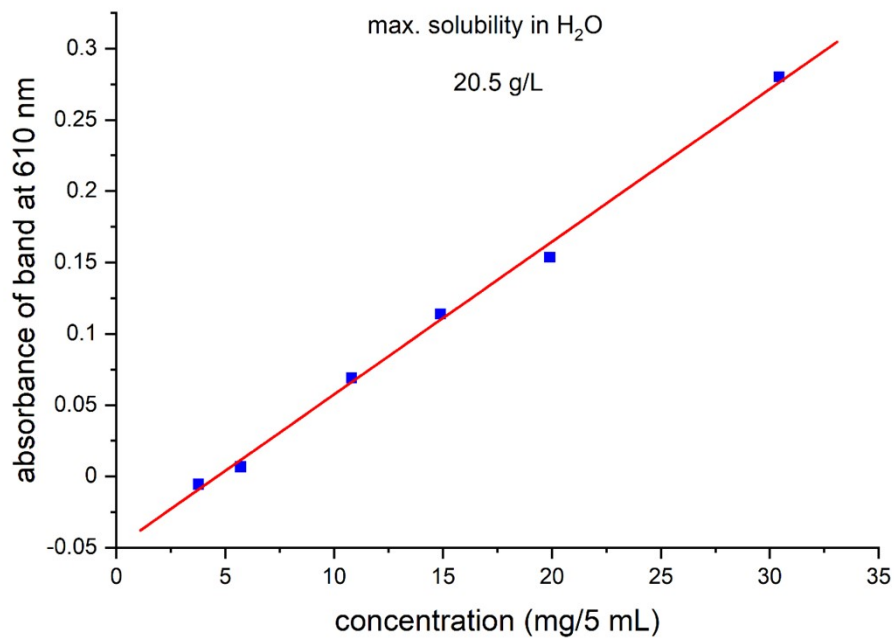

**Figure S4:** Determination of the maximum solubility of  $[\text{Ni}(\text{en})_3]_2[\text{V}_6\text{As}_8\text{O}_{26}]$  in water using the absorbance at 610 nm in the UV/Vis spectra.

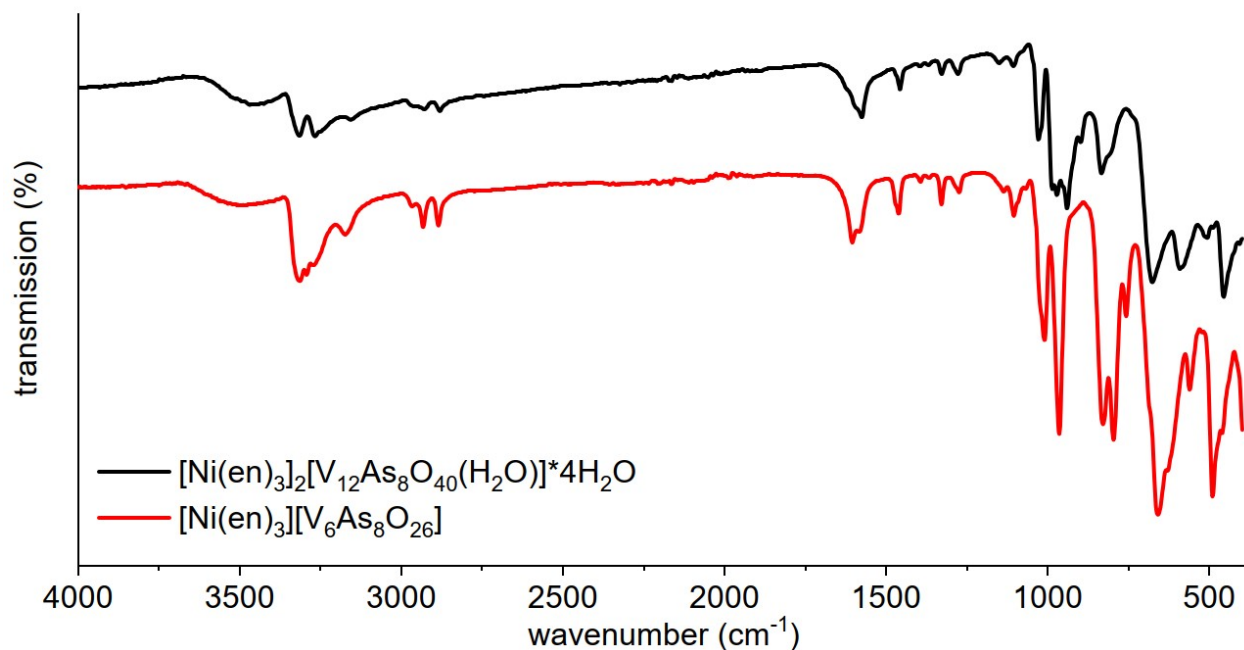

**Figure S5.** Comparison of the IR spectra for compound **1** (red) and **2** (black). Note the substantial changes in the vibrations in the range of 1100 – 600 cm<sup>-1</sup>, which are mainly due to metal-oxygen modes. Assignments: 3450 cm<sup>-1</sup> (O-H stretch), 3315 – 3150 cm<sup>-1</sup> (N-H stretching), 2970-2880 cm<sup>-1</sup> (C-H stretching), 1600-1580 cm<sup>-1</sup> (-NH<sub>2</sub> bending), 1150-1100 cm<sup>-1</sup> (CH<sub>2</sub> bending/deformation), ~ 960 cm<sup>-1</sup> (terminal V=O), ~670 cm<sup>-1</sup> (V-O-V).<sup>1,2</sup>

**Table S1.** Selected crystal data and results of the structure refinement.

| compound                                          | 1                                     |
|---------------------------------------------------|---------------------------------------|
| Formula                                           | $C_{12}H_{48}As_8N_{12}Ni_2O_{26}V_6$ |
| MW / g mol <sup>-1</sup>                          | 1798.9797                             |
| crystal system                                    | tetragonal                            |
| space group                                       | $I4_1/acd$                            |
| $a$ / Å                                           | 20.3058(5)                            |
| $b$ / Å                                           | 20.3058(5)                            |
| $c$ / Å                                           | 24.3847(7)                            |
| $V$ / Å <sup>3</sup>                              | 10054.4(6)                            |
| $T$ / K                                           | 200(2)                                |
| $Z$                                               | 8                                     |
| $D_{\text{calc}}$ / g cm <sup>-3</sup>            | 2.377                                 |
| $\mu$ / mm <sup>-1</sup>                          | 7.109                                 |
| $\theta_{\text{max}}$ / deg                       | 26.004                                |
| measured refl.                                    | 33243                                 |
| unique refl.                                      | 2477                                  |
| refl. $F_0 > 4\sigma(F_0)$                        | 2245                                  |
| parameter                                         | 151                                   |
| $R_{\text{int}}$                                  | 0.0854                                |
| $R_1 [F_0 > 4\sigma(F_0)]$                        | 0.0396                                |
| $wR_2$ [all data]                                 | 0.0950                                |
| GOF                                               | 1.198                                 |
| $\Delta\rho_{\text{max/min}}$ / e Å <sup>-3</sup> | 0.388/-0.438                          |

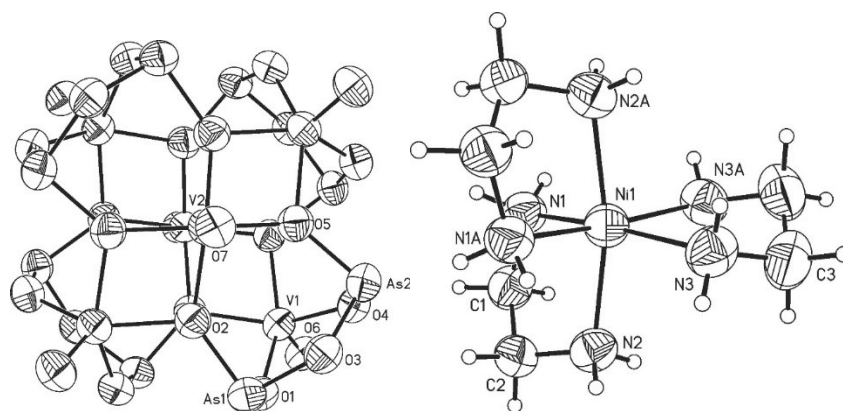

**Figure S6.** View of the cluster anion (left) and of the Ni<sup>2+</sup> centred complex (right) with labelling and displacement ellipsoids drawn at the 50% probability level.

## Details of the crystal structure determination of $[\text{Ni}(\text{en})_3]_2[\text{V}_{12}\text{As}_8\text{O}_{40}(\text{H}_2\text{O})]\cdot 4\text{H}_2\text{O}$

The X-ray powder diffraction pattern did not coincide with that of  $[\text{Ni}(\text{en})_3]_2[\text{V}_6\text{As}_8\text{O}_{26}]$  and did not match with any pattern of As-POVs. All reflections of the XRPD pattern could be indexed successfully (monoclinic,  $P2_1/n$ ) with lattice parameters  $a = 23.153 \text{ \AA}$ ,  $b = 11.920 \text{ \AA}$ ,  $c = 11.731 \text{ \AA}$  and  $\beta = 95.233^\circ$ . The IR spectrum showed absorptions of the  $[\text{Ni}(\text{en})_3]^{2+}$  cation but significant differences in the region of As-O and V-O vibrations were evident compared to  $[\text{Ni}(\text{en})_3]_2[\text{V}_6\text{As}_8\text{O}_{26}]$  (see Figure S5). The refined sum formula of the compound is  $[\text{Ni}(\text{en})_3]_2[\text{V}_{12}\text{As}_8\text{O}_{40}(\text{H}_2\text{O})]\cdot 4\text{H}_2\text{O}$ , however, the water content should not be over interpreted since it is solely based on the residual electron density and not on precise chemical analytics. The unit cell content was estimated based on the available data: The  $[\text{Ni}(\text{en})_3]^{2+}$  complex and the ratio of the metals were included, the number of oxygen atoms was calculated to match the remaining unit cell volume. No information on the cluster type was available, which renders this case a particular difficult one. The intensity data exhibit outstanding sharp reflections due to the low instrumental contribution and excellent counting statistics. Applying the charge flipping method resulted in the location of numerous metal ions in a cluster-like motif and some of the oxygen atoms were located at reasonable positions as well. This starting model was subsequently improved in a Rietveld refinement guided by chemical knowledge. First, all atoms not attached to the cluster were removed and the  $[\text{Ni}(\text{en})_3]^{2+}$  cation was introduced as rigid body with only rotational and translational degrees of freedom. The initial position was determined by simulated annealing and further subjected to unconstrained movement in the further steps. Next, the cluster motif was refined assuming that structural building blocks like e.g.  $\text{VO}_5$  pyramids and  $\text{As}_2\text{O}_5$  dumbbells are intact. The  $\text{VO}_5$  pyramids are treated as rigid bodies leading to a drop of the  $R_{\text{wp}}$  value, while the As atoms were refined individually, since the connection to oxygen atoms is determined by the attached  $\text{VO}_5$  rigid bodies. Further refinements and continuous inspection of the Fourier maps led to identification of the  $[\text{V}_{12}\text{As}_8]$  cluster type. At this stage the structure solution was restarted in real space with large rigid bodies significantly reducing the number of refined parameters. The  $[\text{V}_{12}\text{As}_8\text{O}_{40}]^{4-}$  ion has a fourfold rotational symmetry and in the space group  $P2_1/n$  half of it is symmetry generated. Two identical rigid bodies comprising  $\text{As}_2\text{V}_3\text{O}_{10}$  together with a rigid body representing the  $[\text{Ni}(\text{en})_3]^{2+}$  cation were subjected to global optimisation by simulated annealing. A very similar result to the above described procedure was obtained and subjected to a Rietveld refinement after solving the structure. By inspection of the Fourier map additional electron density was found that could be assigned to water molecules: one at a special position in the centre of the cluster, which is often observed in related As-POVs,<sup>2,3</sup> and two additional which are most probable of  $\text{H}_2\text{O}$  molecules. The presence of water is supported by the broad absorption centred at  $3450 \text{ cm}^{-1}$  in the IR spectrum (Figure S5). In a final Rietveld refinement the location of the rigid bodies and water molecules could be subjected to a stable refinement converging with a convincing  $R_{\text{wp}}$  of 4.7 %, the difference plot of the final fit is presented in the Figure 6 in the main part (in the Table below the data for the refinements is summarized). Further support for the validity of the identified structure can be derived comparing the structural features with those found in literature:  $[\text{NHET}_3]_4[\text{V}_{12}\text{As}_8\text{O}_{40}(\text{H}_2\text{O})]\cdot \text{H}_2\text{O}$ ,<sup>3</sup> and  $[\text{NHET}_3]_2[\text{NH}_2\text{Me}_2][\text{V}_{12}\text{As}_8\text{O}_{40}(\text{HCO}_2)]\cdot 2\text{H}_2\text{O}$ ,<sup>4</sup> are examples with the same cluster and large cations, that both crystallize in the space group  $P2_1/c$ . Interestingly, the corresponding ammonium salt of compound **2** crystallizes in the higher symmetric space group  $Pnmm$ .<sup>2</sup>

**Table S2.** Selected crystal data and results of the structure refinement for  $[\text{Ni}(\text{en})_3]_2[\text{As}_8\text{V}_{12}\text{O}_{40}(\text{H}_2\text{O})]\cdot 4\text{H}_2\text{O}$

| <b>Compound</b>                        | <b>2</b>                                                                     |
|----------------------------------------|------------------------------------------------------------------------------|
| Formula                                | $\text{C}_{12}\text{As}_8\text{N}_{12}\text{Ni}_2\text{O}_{45}\text{V}_{12}$ |
| MW / g mol <sup>-1</sup>               | 2360.26                                                                      |
| crystal system                         | monoclinic                                                                   |
| space group                            | $P2_1/n$                                                                     |
| $a$ / Å                                | 23.1578(5)                                                                   |
| $b$ / Å                                | 11.9216(3)                                                                   |
| $c$ / Å                                | 11.7372(4)                                                                   |
| $\beta$ / °                            | 95.2333(16)                                                                  |
| $V$ / Å <sup>3</sup>                   | 3226.88(15)                                                                  |
| $T$ / K                                | 265(2)                                                                       |
| $Z$                                    | 2                                                                            |
| $D_{\text{calc}}$ / g cm <sup>-3</sup> | 2.429                                                                        |
| $\mu$ / mm <sup>-1</sup>               | 3.382                                                                        |
| Wavelength / Å                         | 0.5639132                                                                    |
| $R_p$ / %                              | 4.03                                                                         |
| $R_{\text{wp}}$ / %                    | 5.21                                                                         |
| $R_{\text{exp}}$ / %                   | 0.47                                                                         |
| $R_{\text{Bragg}}$ / %                 | 3.66                                                                         |
| Starting angle / ° 2 $\theta$          | 1.5                                                                          |
| Final angle / ° 2 $\theta$             | 32                                                                           |



**Table S3.** Bond lengths [Å] and angles [°] for the cluster anion. Symmetry transformations used to generate equivalent atoms: #1  $-y+5/4, x+1/4, -z+3/4$ ; #2  $y-1/4, -x+5/4, -z+3/4$ ; #3  $-x+1, -y+3/2, z+0$ ; #4  $-y+5/4, -x+5/4, -z+5/4$ .

|                    |            |                    |            |
|--------------------|------------|--------------------|------------|
| As(1)-O(1)         | 1.709(3)   | As(2)-O(4)         | 1.726(3)   |
| As(1)-O(3)         | 1.800(3)   | As(2)-O(3)         | 1.792(3)   |
| As(1)-O(2)         | 1.814(3)   | As(2)-O(5)         | 1.795(3)   |
| V(1)-O(6)          | 1.599(4)   | V(2)-O(7)          | 1.602(5)   |
| V(1)-O(1)          | 1.916(3)   | V(2)-O(5)#3        | 1.960(3)   |
| V(1)-O(4)          | 1.935(3)   | V(2)-O(5)          | 1.960(3)   |
| V(1)-O(2)#1        | 2.000(3)   | V(2)-O(2)          | 1.960(3)   |
| V(1)-O(5)#2        | 2.001(3)   | V(2)-O(2)#3        | 1.960(3)   |
| O(2)-V(1)#2        | 2.000(3)   | O(5)-V(1)#1        | 2.001(3)   |
| O(1)-As(1)-O(3)    | 102.79(16) | O(4)-As(2)-O(3)    | 101.36(16) |
| O(1)-As(1)-O(2)    | 100.94(16) | O(4)-As(2)-O(5)    | 101.46(15) |
| O(3)-As(1)-O(2)    | 95.36(15)  | O(3)-As(2)-O(5)    | 96.66(15)  |
| O(6)-V(1)-O(1)     | 106.59(17) | O(7)-V(2)-O(5)#3   | 108.02(10) |
| O(6)-V(1)-O(4)     | 105.43(17) | O(7)-V(2)-O(5)     | 108.02(10) |
| O(1)-V(1)-O(4)     | 89.64(15)  | O(5)#3-V(2)-O(5)   | 144.0(2)   |
| O(6)-V(1)-O(2)#1   | 107.57(16) | O(7)-V(2)-O(2)     | 109.16(10) |
| O(1)-V(1)-O(2)#1   | 145.09(14) | O(5)#3-V(2)-O(2)   | 76.75(14)  |
| O(4)-V(1)-O(2)#1   | 88.18(14)  | O(5)-V(2)-O(2)     | 91.49(14)  |
| O(6)-V(1)-O(5)#2   | 107.85(17) | O(7)-V(2)-O(2)#3   | 109.16(10) |
| O(1)-V(1)-O(5)#2   | 87.99(14)  | O(5)#3-V(2)-O(2)#3 | 91.49(14)  |
| O(4)-V(1)-O(5)#2   | 145.88(14) | O(5)-V(2)-O(2)#3   | 76.75(14)  |
| O(2)#1-V(1)-O(5)#2 | 74.92(14)  | O(2)-V(2)-O(2)#3   | 141.7(2)   |
| As(1)-O(1)-V(1)    | 128.53(19) | As(2)-O(4)-V(1)    | 128.52(18) |
| As(1)-O(2)-V(2)    | 132.55(18) | As(2)-O(5)-V(2)    | 131.87(18) |
| As(1)-O(2)-V(1)#2  | 121.92(17) | As(2)-O(5)-V(1)#1  | 123.12(17) |
| V(2)-O(2)-V(1)#2   | 104.05(15) | V(2)-O(5)-V(1)#1   | 104.02(15) |
| As(2)-O(3)-As(1)   | 126.92(19) |                    |            |

**Table S4.** Bond lengths [Å] and angles [°] for the Ni coordination. Symmetry transformations used to generate equivalent atoms: A:  $-y+5/4, -x+5/4, -z+5/4$

|                   |            |                   |           |
|-------------------|------------|-------------------|-----------|
| Ni(1)-N(1)        | 2.115(4)   | Ni(1)-N(3)        | 2.125(4)  |
| Ni(1)-N(1A)       | 2.115(4)   | Ni(1)-N(2)        | 2.127(4)  |
| Ni(1)-N(3A)       | 2.125(4)   | Ni(1)-N(2A)       | 2.127(4)  |
| N(1)-Ni(1)-N(1A)  | 94.9(3)    | N(3A)-Ni(1)-N(2)  | 95.45(17) |
| N(1)-Ni(1)-N(3A)  | 92.61(18)  | N(3)-Ni(1)-N(2)   | 93.64(17) |
| N(1A)-Ni(1)-N(3A) | 170.55(18) | N(1)-Ni(1)-N(2A)  | 91.40(16) |
| N(1)-Ni(1)-N(3)   | 170.55(18) | N(1A)-Ni(1)-N(2A) | 80.52(16) |
| N(1A)-Ni(1)-N(3)  | 92.61(18)  | N(3A)-Ni(1)-N(2A) | 93.64(17) |
| N(3A)-Ni(1)-N(3)  | 80.5(3)    | N(3)-Ni(1)-N(2A)  | 95.44(17) |
| N(1)-Ni(1)-N(2)   | 80.52(16)  | N(2)-Ni(1)-N(2A)  | 168.1(2)  |
| N(1A)-Ni(1)-N(2)  | 91.40(16)  |                   |           |

**Table S5.** Hydrogen bonds [Å and °]. Symmetry transformations used to generate equivalent atoms: #1  $-y+5/4, x+1/4, -z+3/4$ ; #5  $-x+1, -y+2, -z+1$ ; #6  $-x+1, y, z+1/2$ ; #7  $y-3/4, x+1/4, z+1/4$ .

| D-H...A             | d(D-H) | d(H...A) | d(D...A) | <(DHA) |
|---------------------|--------|----------|----------|--------|
| N(1)-H(1N)...O(7)   | 0.91   | 2.16     | 2.975(5) | 149.2  |
| N(1)-H(2N)...O(6)#1 | 0.91   | 2.48     | 3.233(6) | 139.9  |
| N(2)-H(3N)...O(4)#5 | 0.91   | 2.16     | 3.034(5) | 159.9  |
| N(2)-H(4N)...O(6)#6 | 0.91   | 2.17     | 3.024(5) | 156.5  |
| N(3)-H(5N)...O(4)#7 | 0.91   | 2.31     | 3.191(6) | 163.9  |
| N(3)-H(6N)...O(6)#6 | 0.91   | 2.46     | 3.277(6) | 148.8  |
| C(3)-H(3A)...O(6)#5 | 0.99   | 2.63     | 3.616(7) | 178.2  |

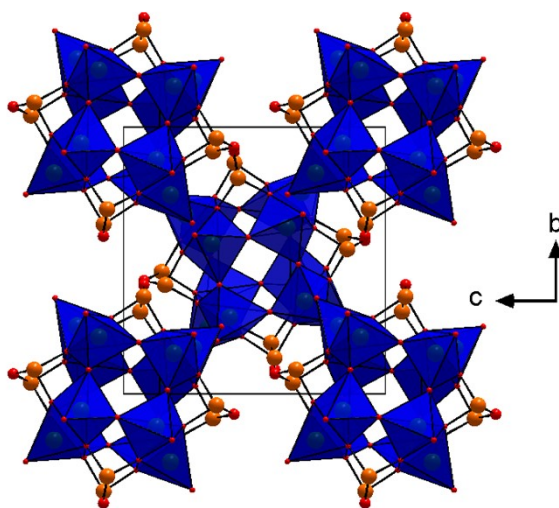

**Figure S7.** Arrangement of the cluster anions in the unit cell of the structure of compound 2.

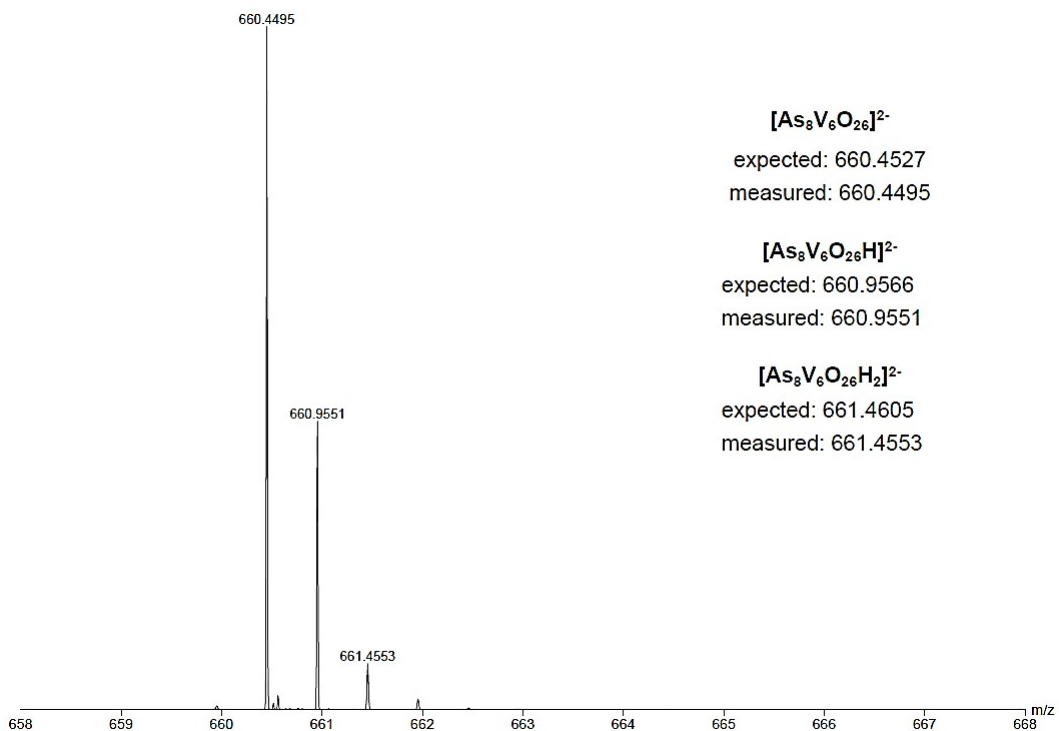

**Figure S8:** Zoom into the region containing the ion at  $m/z$  660 of the initial measurement for the sample of the parent compound in  $\text{H}_2\text{O}$  (100  $\mu\text{M}$ ). Ionisation proceeds via loss of the counterions and subsequent double oxidation to produce  $-2$  ions. Several different oxidation states are present with charge compensation coming from protonation.

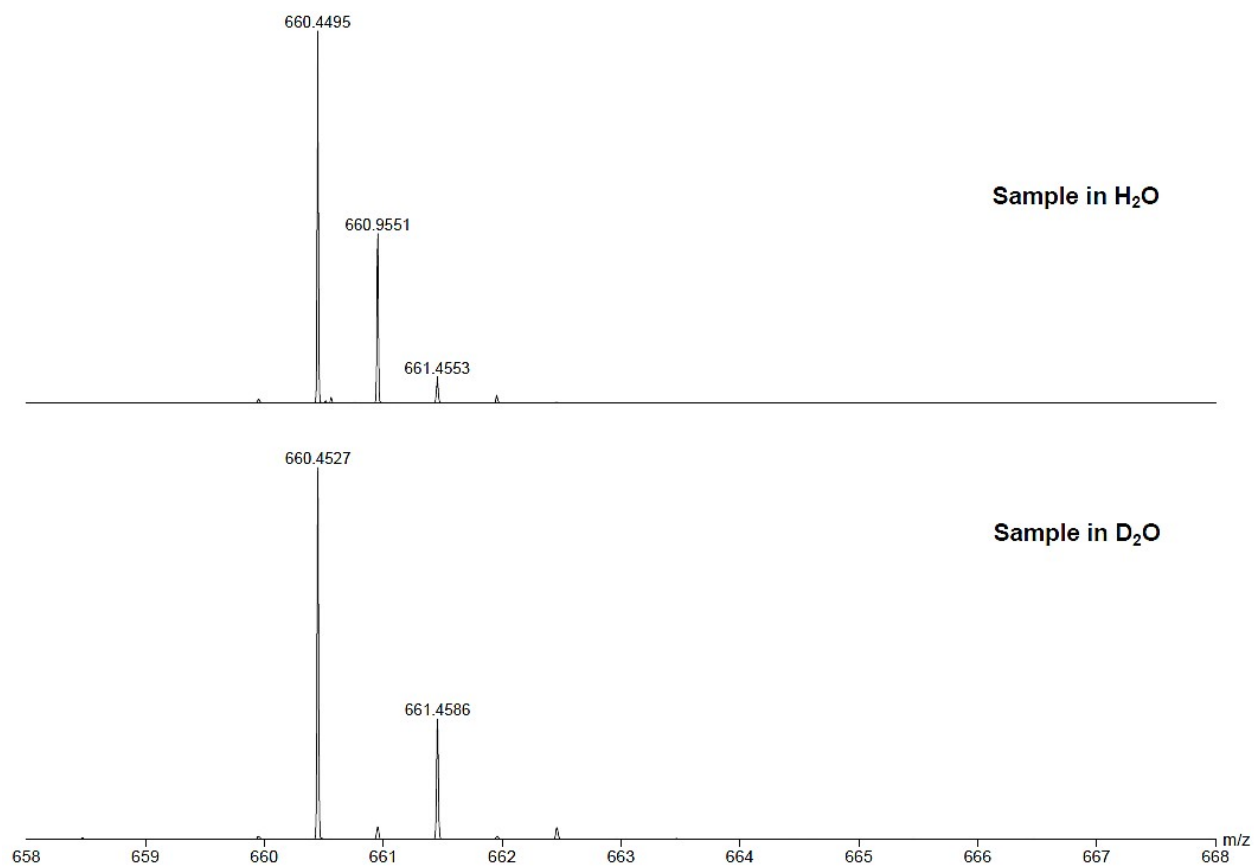

**Figure S9:** Initial measurements of 100  $\mu\text{M}$  solution in  $\text{H}_2\text{O}$  (top) and in  $\text{D}_2\text{O}$  (bottom). As the elements in the cluster are almost completely monoisotopic, the change in peak spacing from 1 (upper spectrum; protonated) to 2 (bottom spectrum; deuterated) clearly confirms the assignment as protonated clusters appear as deuterated clusters in the bottom spectrum.

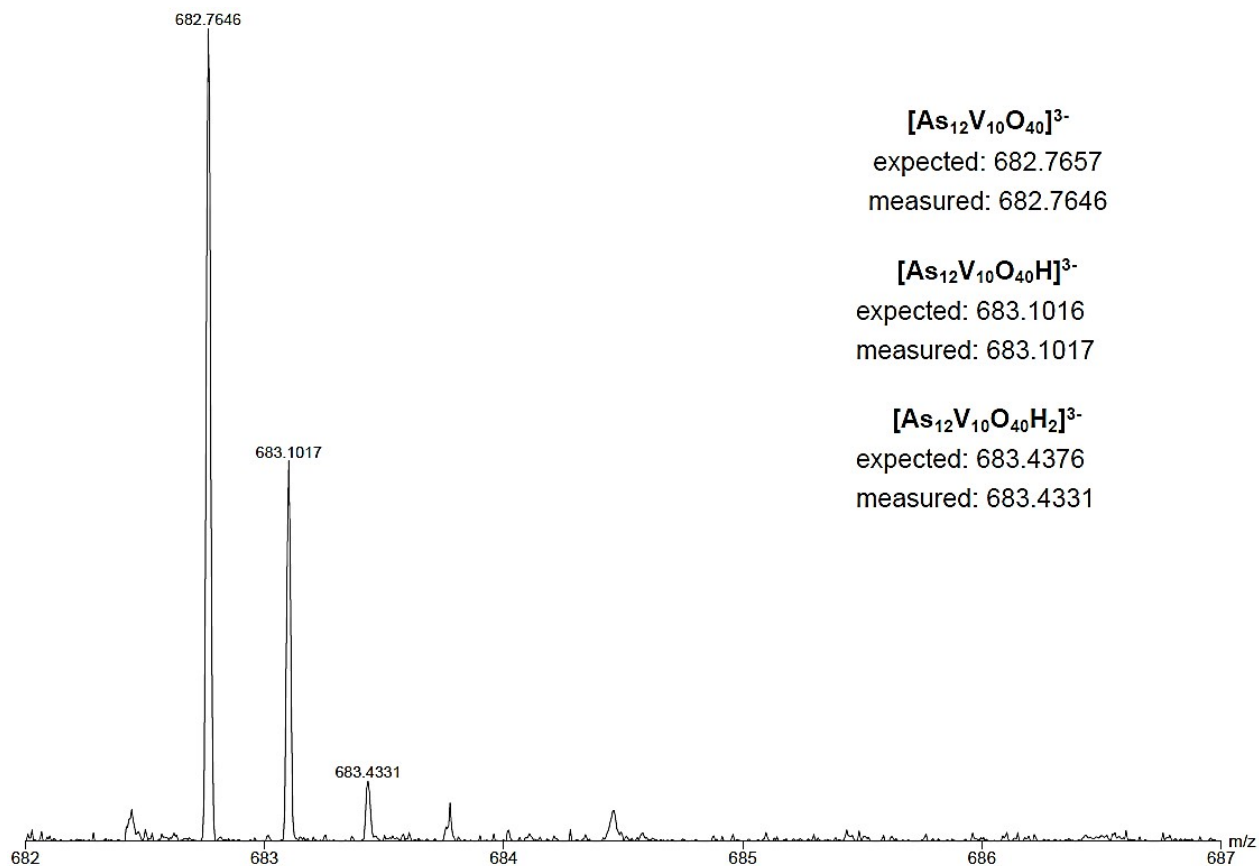

**Figure S10:** Zoom into the region containing the ion at  $m/z$  682 of the sample in H<sub>2</sub>O which is formed after several days. The signals and their spacing are consistent with the -3 charge state of a [As<sub>12</sub>V<sub>10</sub>O<sub>40</sub>] cluster. Several different oxidation states are present with charge compensating protons.

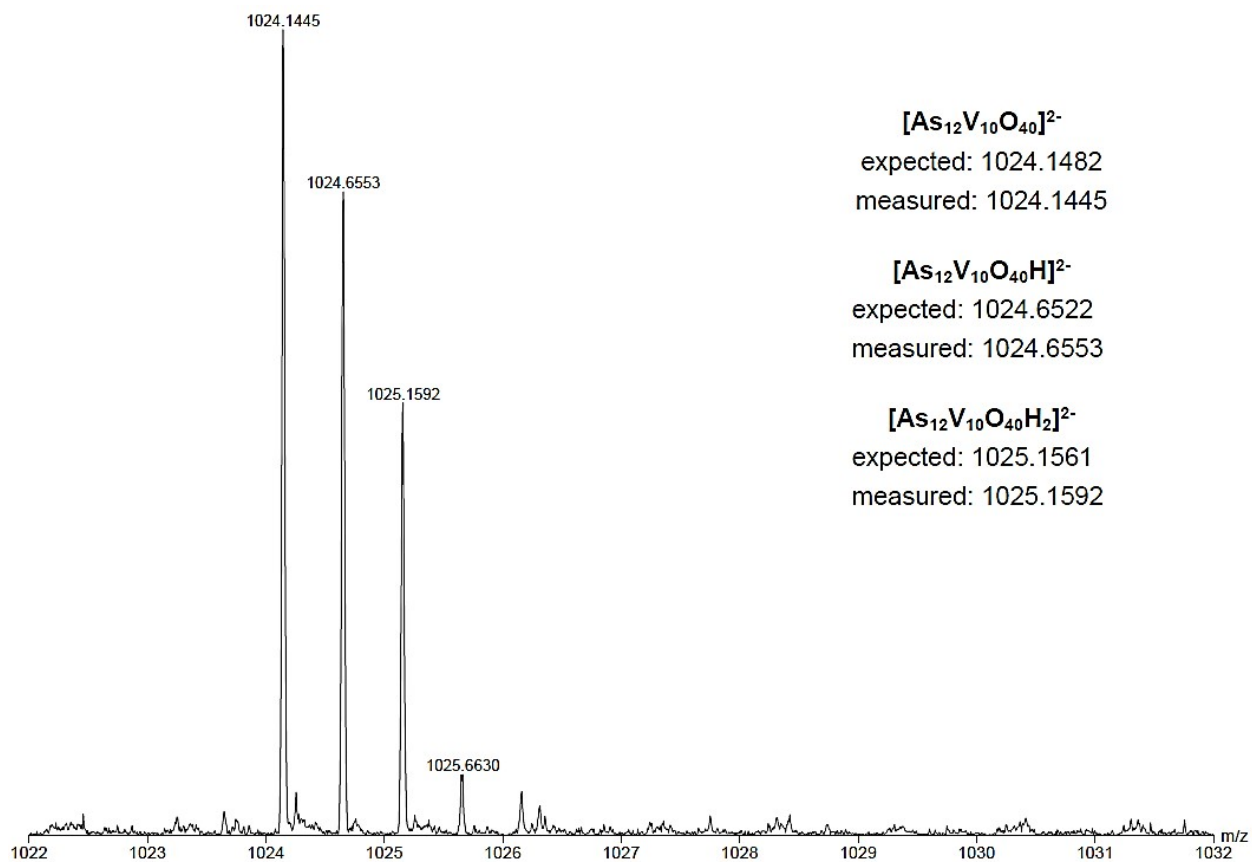

**Figure S11:** Zoom into the region containing the ion at  $m/z$  1024 of the sample in  $\text{H}_2\text{O}$  which is formed after several days. The signals and their spacings are consistent with the  $-2$  charge state of a  $[\text{As}_{12}\text{V}_{10}\text{O}_{40}]$  cluster. Several different oxidation states are present with charge compensating protons.

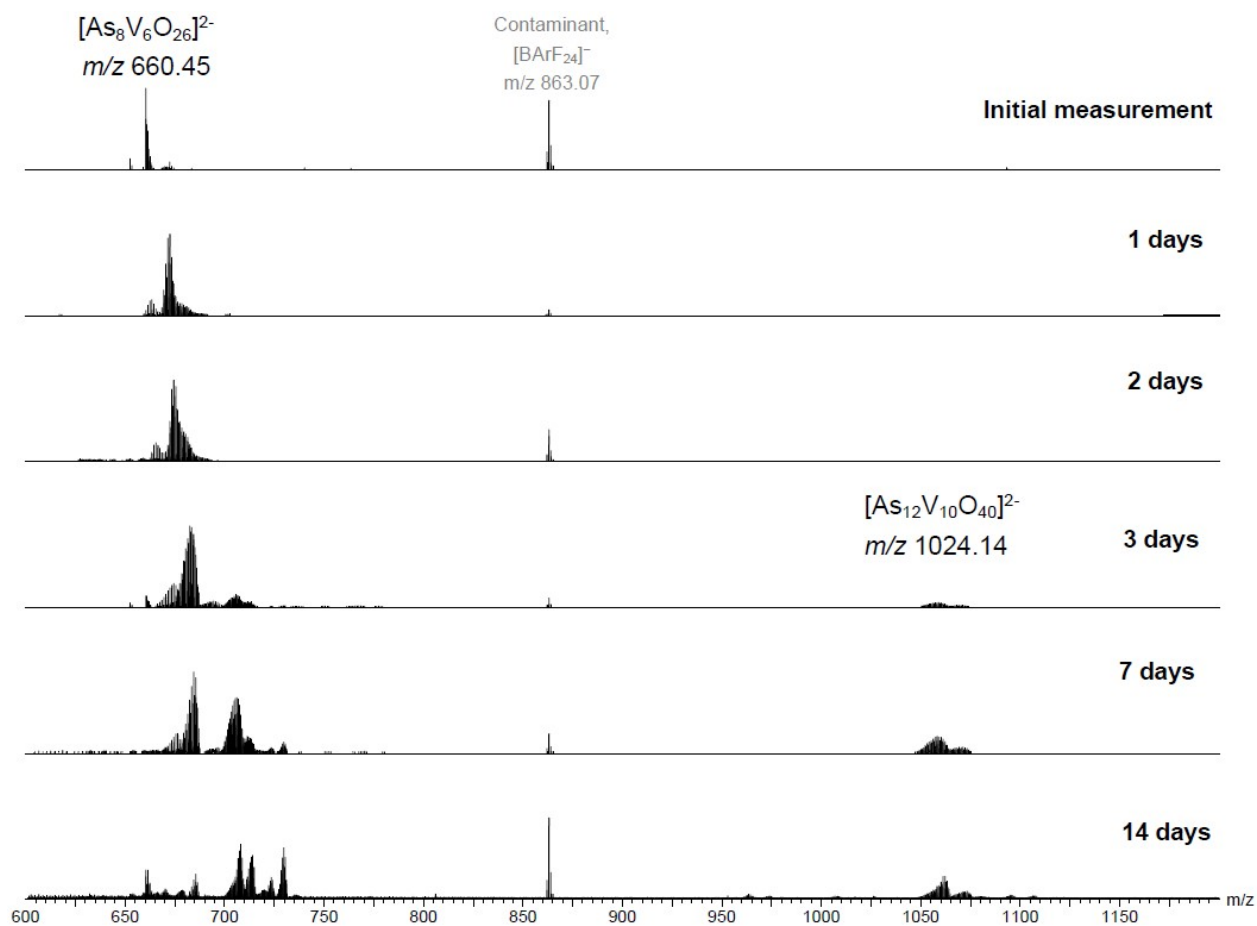

**Figure S12:** Full spectra of the samples in  $\text{H}_2^{18}\text{O}$  measured after different time intervals. The cluster undergoes exchange over the course of a few days occurring faster than the loss of the initial and formation of the new cluster.

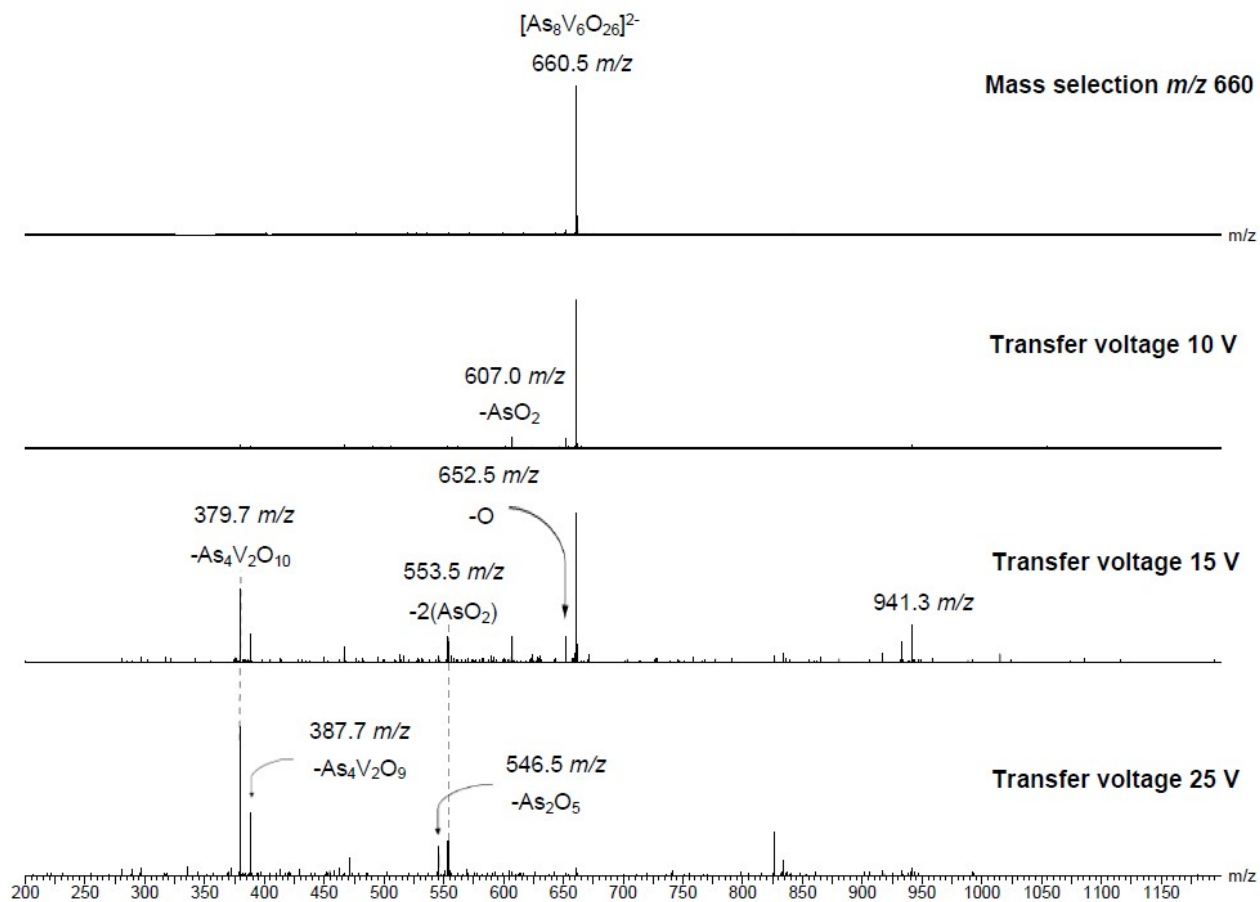

**Figure S13:** CID measurements of  $m/z$  660 of  $[\text{V}_6\text{As}_8\text{O}_{26}]$ . Fragmentation proceeds via the loss of  $\text{AsO}_2$  moieties followed by the subsequent loss of  $\text{VO}_8$ .



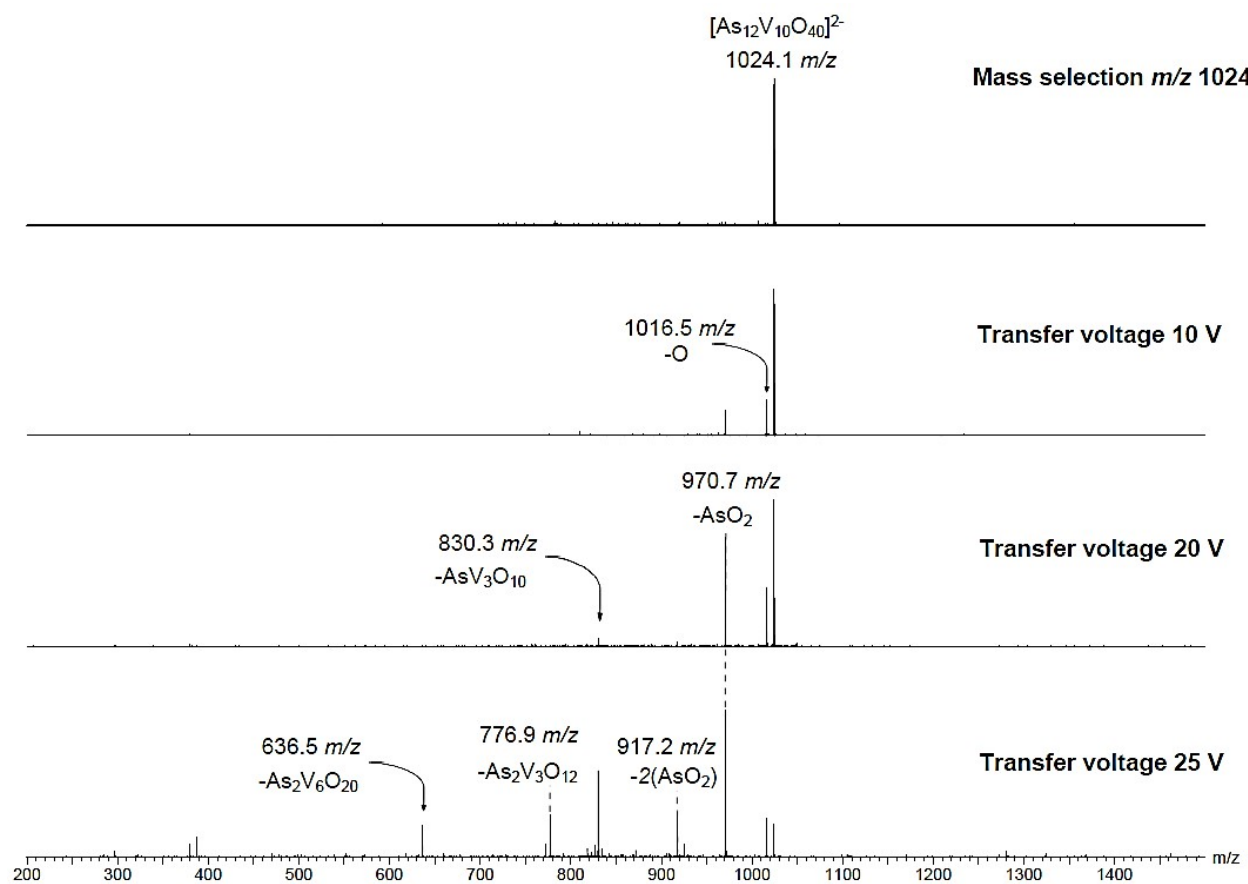

**Figure S14:** CID measurements of  $m/z$  1024 of  $[As_{12}V_{10}O_{40}]$ .

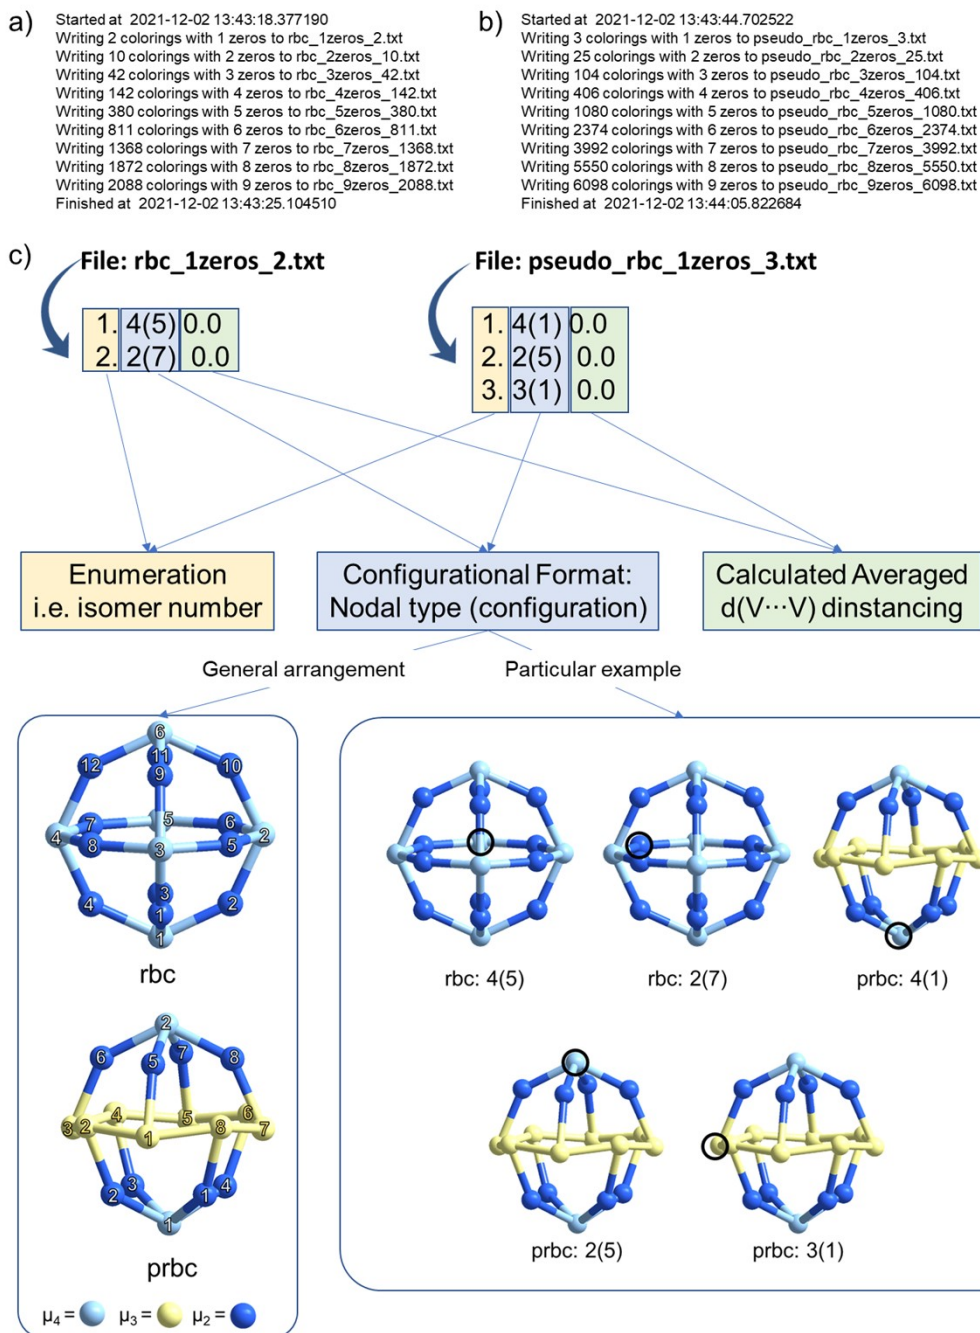

**Figure S15:** Program terminal message from the execution of `rbc_colorings.py` script (a) and `pseudo_rbc_colorings.py` (b). Examples of the printed isomer set files for  $x = 1$  (c). The printed files provide information on the isomer enumeration (left), substituted configuration (middle) and averaged distance between the substituting sites (right). The substituting configuration is kept open, that is, with a consideration that all of the 18 V centres can be substituted. In this case 4, 3 and 2 inform over which metal centres does the substitution takes place. The numerical information in the parentheses that follow shows the particular position that is substituted. Degeneracies obtained through rotations are not printed in the output files.

**Table S6:** Calculated bond lengths in Å between V, As, terminal and bridging O atoms (i.e. O<sub>t</sub> and O<sub>b</sub>) for selected set of experimentally reported As-POVs and the herein proposed  $\alpha$ -[V<sub>10</sub>As<sub>12</sub>O<sub>40</sub>]<sup>4-</sup> model. All structures are optimized at COSMO/ZORA-SCALAR-UBP86/TZP level and their geometries are provided at the end of this file.

| Bond lengths [Å]                                                            |                  |                  |                    |
|-----------------------------------------------------------------------------|------------------|------------------|--------------------|
| Structure                                                                   | V-O <sub>t</sub> | V-O <sub>b</sub> | As -O <sub>b</sub> |
| $\alpha$ -[V <sub>10</sub> As <sub>12</sub> O <sub>40</sub> ] <sup>4-</sup> | 1.622-1.638      | 1.943-2.005      | 1.739-1.883        |
| $\beta$ -[V <sub>14</sub> As <sub>8</sub> O <sub>42</sub> ] <sup>4-</sup>   | 1.616-1.645      | 1.958-2.008      | 1.827-1.833        |
| $\alpha$ -[V <sub>14</sub> As <sub>8</sub> O <sub>42</sub> ] <sup>4-</sup>  | 1.617-1.633      | 1.954-2.025      | 1.819-1.829        |
| [V <sub>16</sub> As <sub>4</sub> O <sub>42</sub> ] <sup>8-</sup>            | 1.646-1.663      | 1.935-1.998      | 1.814-1.839        |
| [V <sub>15</sub> As <sub>6</sub> O <sub>42</sub> ] <sup>6-</sup>            | 1.633-1.640      | 1.942-2.040      | 1.832-1.834        |
| [V <sub>6</sub> As <sub>8</sub> O <sub>26</sub> ] <sup>4-</sup>             | 1.633-1.634      | 1.946-2.006      | 1.763-1.859        |

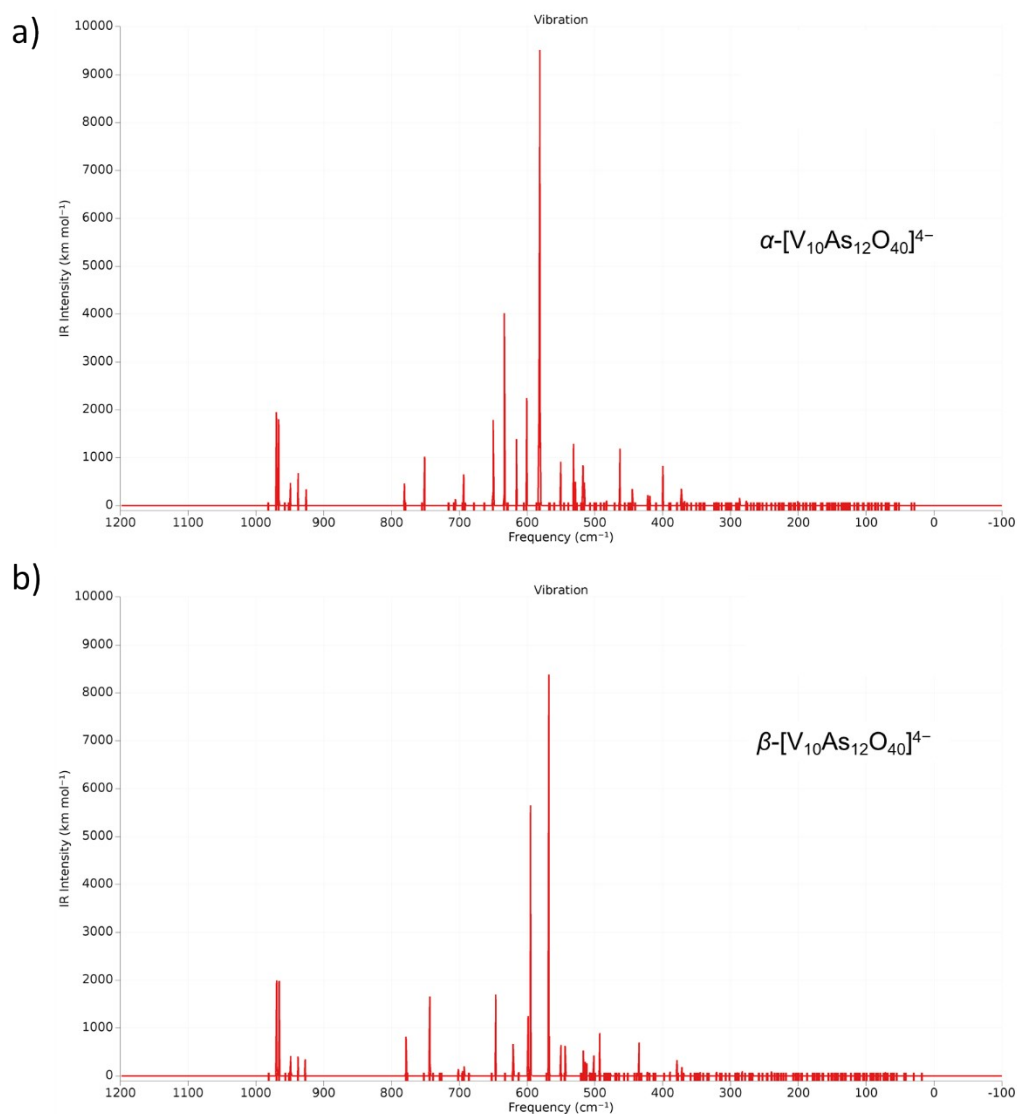

**Figure S16:** Frequency calculation of a)  $\alpha$ -[V<sub>10</sub>As<sub>12</sub>O<sub>40</sub>]<sup>4-</sup>; b)  $\beta$ -[V<sub>10</sub>As<sub>12</sub>O<sub>40</sub>]<sup>4-</sup> at COSMO/ZORA-SCALAR-UBP86/TZP level.

**Table S7:** Orbital energy values as calculated at COSMO/ZORA-SCALAR-UB3LYP/TZP level.  $E_{HOMO}$  is the energy of the  $\alpha$ -spin HOMO,  $E_{LUMO}$  is the energy of the  $\alpha$ -spin LUMO and  $\Delta E_{HOMO-LUMO}$  is the HOMO-LUMO gap energy.

|                        | [V <sub>16</sub> As <sub>4</sub> O <sub>42</sub> ] <sup>8-</sup> | [V <sub>15</sub> As <sub>6</sub> O <sub>42</sub> ] <sup>6-</sup> | $\alpha$ -[V <sub>14</sub> As <sub>8</sub> O <sub>42</sub> ] <sup>4-</sup> | $\beta$ -[V <sub>14</sub> As <sub>8</sub> O <sub>42</sub> ] <sup>4-</sup> | $\alpha$ -[V <sub>10</sub> As <sub>12</sub> O <sub>40</sub> ] <sup>4-</sup> | [V <sub>6</sub> As <sub>8</sub> O <sub>26</sub> ] <sup>4-</sup> |
|------------------------|------------------------------------------------------------------|------------------------------------------------------------------|----------------------------------------------------------------------------|---------------------------------------------------------------------------|-----------------------------------------------------------------------------|-----------------------------------------------------------------|
| $E_{HOMO}$             | -5.86                                                            | -6.26                                                            | -6.70                                                                      | -6.37                                                                     | -6.13                                                                       | -5.88                                                           |
| $E_{LUMO}$             | -2.03                                                            | -2.26                                                            | -2.61                                                                      | -2.75                                                                     | -2.43                                                                       | -1.98                                                           |
| $\Delta E_{HOMO-LUMO}$ | 3.83                                                             | 4.01                                                             | 4.09                                                                       | 3.62                                                                      | 3.70                                                                        | 3.90                                                            |

**Table S8:** Important energy values of the isomeric  $[V_{14}As_8O_{42}]^{4-}$  structures as calculated at COSMO/ZORA-SCALAR-UB3LYP/TZP level.  $E_{HOMO}$  is the energy of the  $\alpha$ -spin HOMO,  $E_{LUMO}$  is the energy of the  $\alpha$ -spin LUMO,  $\Delta E_{HOMO-LUMO}$  is the HOMO-LUMO gap energy,  $E_b$  is the total bonding energy as obtained from the output of the single point calculations,  $\Delta E_b$  is the bonding energy relative to  $\alpha$ - $[V_{14}As_8O_{42}]^{4-}$ ,  $d_{(V \dots V)}$  is the interatomic distance between the substituting V atom pairs. For representation of the isomers consult figure 11.

|                                      | Isomeric $[V_{14}As_8O_{42}]^{4-}$ |                               |                               |                                |                                  |                               |                             |
|--------------------------------------|------------------------------------|-------------------------------|-------------------------------|--------------------------------|----------------------------------|-------------------------------|-----------------------------|
|                                      | $\alpha$ -<br><i>anti</i> -1,5     | $\beta$ -<br><i>anti</i> -1,4 | $\gamma$ -<br><i>syn</i> -1,5 | $\delta$ -<br><i>anti</i> -1,3 | $\epsilon$ -<br><i>anti</i> -1,2 | $\zeta$ -<br><i>anti</i> -1,1 | $\eta$ -<br><i>syn</i> -1,3 |
| $E_{HOMO}$ [eV]                      | -6.13                              | -6.10                         | -6.06                         | -6.12                          | -6.00                            | -5.85                         | -4.84                       |
| $E_{LUMO}$ [eV]                      | -2.43                              | -2.55                         | -2.50                         | -2.64                          | -2.68                            | -2.70                         | -2.94                       |
| $\Delta E_{HOMO-LUMO}$ [eV]          | 3.70                               | 3.56                          | 3.56                          | 3.47                           | 3.33                             | 3.14                          | 1.90                        |
| $E_b$ [kJ·mol <sup>-1</sup> ]        | -54386.42                          | -54372.77                     | -54368.22                     | -54354.63                      | -54342.84                        | -54358.39                     | -54342.2                    |
| $\Delta E_b$ [kJ·mol <sup>-1</sup> ] | 0.00                               | 13.65                         | 18.20                         | 31.79                          | 43.58                            | 28.03                         | 44.23                       |
| $d_{(V \dots V)}$                    | 8.97                               | 8.35                          | 7.40                          | 6.99                           | 5.85                             | 5.47                          | 3.54                        |

## Cartesian coordinates (in Å)

[V<sub>16</sub>As<sub>4</sub>O<sub>42</sub>]<sup>8-</sup>  
62

|    |             |             |             |
|----|-------------|-------------|-------------|
| As | -0.00000000 | -1.65898096 | 4.43626849  |
| O  | 1.38341188  | -1.44465610 | 3.28338305  |
| O  | 0.00000000  | -0.00000000 | 5.22866619  |
| O  | -1.38341188 | -1.44465610 | 3.28338305  |
| V  | 1.89977913  | -2.80264898 | 1.85690358  |
| V  | 2.69754338  | -0.00000000 | 2.85918205  |
| As | 0.00000000  | 1.65898096  | 4.43626849  |
| V  | -1.89977913 | -2.80264898 | 1.85690358  |
| V  | -2.69754338 | 0.00000000  | 2.85918205  |
| O  | 2.80891594  | -3.93452494 | 2.62438413  |
| O  | 1.77992636  | -3.38025691 | -0.00000000 |
| O  | -0.00000000 | -3.38277594 | 1.79696039  |
| O  | 3.00223100  | -1.25039188 | 1.41425989  |
| O  | 3.00223100  | 1.25039188  | 1.41425989  |
| O  | 3.94096062  | -0.00000000 | 3.93829263  |
| O  | 1.38341188  | 1.44465610  | 3.28338305  |
| O  | -1.38341188 | 1.44465610  | 3.28338305  |
| O  | -1.77992636 | -3.38025691 | -0.00000000 |
| O  | -2.80891594 | -3.93452494 | 2.62438413  |
| O  | -3.00223100 | -1.25039188 | 1.41425989  |
| O  | -3.94096062 | 0.00000000  | 3.93829263  |
| O  | -3.00223100 | 1.25039188  | 1.41425989  |
| V  | -0.00000000 | -4.16423856 | -0.00000000 |
| V  | 1.89977913  | -2.80264898 | -1.85690358 |
| V  | 3.59988240  | -0.00000000 | -0.00000000 |
| V  | 1.89977913  | 2.80264898  | 1.85690358  |
| V  | -1.89977913 | 2.80264898  | 1.85690358  |
| V  | -1.89977913 | -2.80264898 | -1.85690358 |
| V  | -3.59988240 | 0.00000000  | -0.00000000 |
| O  | -0.00000000 | -5.82702048 | -0.00000000 |
| O  | -0.00000000 | -3.38277594 | -1.79696039 |
| O  | 2.80891594  | -3.93452494 | -2.62438413 |
| O  | 3.00223100  | -1.25039188 | -1.41425989 |
| O  | 1.38341188  | -1.44465610 | -3.28338305 |
| O  | 3.00223100  | 1.25039188  | -1.41425989 |
| O  | 5.24298850  | -0.00000000 | -0.00000000 |
| O  | 0.00000000  | 3.38277594  | 1.79696039  |
| O  | 1.77992636  | 3.38025691  | -0.00000000 |
| O  | 2.80891594  | 3.93452494  | 2.62438413  |
| O  | -1.77992636 | 3.38025691  | -0.00000000 |
| O  | -2.80891594 | 3.93452494  | 2.62438413  |
| O  | -3.00223100 | -1.25039188 | -1.41425989 |
| O  | -1.38341188 | -1.44465610 | -3.28338305 |
| O  | -2.80891594 | -3.93452494 | -2.62438413 |
| O  | -5.24298850 | 0.00000000  | -0.00000000 |
| O  | -3.00223100 | 1.25039188  | -1.41425989 |
| V  | 2.69754338  | -0.00000000 | -2.85918205 |
| As | -0.00000000 | -1.65898096 | -4.43626849 |
| V  | 1.89977913  | 2.80264898  | -1.85690358 |
| V  | 0.00000000  | 4.16423856  | -0.00000000 |
| V  | -1.89977913 | 2.80264898  | -1.85690358 |
| V  | -2.69754338 | 0.00000000  | -2.85918205 |

|    |             |             |             |
|----|-------------|-------------|-------------|
| O  | 3.94096062  | -0.00000000 | -3.93829263 |
| O  | 1.38341188  | 1.44465610  | -3.28338305 |
| O  | 0.00000000  | -0.00000000 | -5.22866619 |
| O  | 0.00000000  | 3.38277594  | -1.79696039 |
| O  | 2.80891594  | 3.93452494  | -2.62438413 |
| O  | 0.00000000  | 5.82702048  | -0.00000000 |
| O  | -2.80891594 | 3.93452494  | -2.62438413 |
| O  | -1.38341188 | 1.44465610  | -3.28338305 |
| O  | -3.94096062 | 0.00000000  | -3.93829263 |
| As | 0.00000000  | 1.65898096  | -4.43626849 |

[V<sub>15</sub>As<sub>6</sub>O<sub>42</sub>]<sup>6-</sup>  
63

|    |             |             |             |
|----|-------------|-------------|-------------|
| As | -4.50775213 | -1.35874309 | 0.95930110  |
| O  | -5.28058525 | 0.00000000  | 0.00000000  |
| O  | -3.38681327 | -2.01524476 | -0.31891033 |
| O  | -3.27823460 | -0.42418768 | 1.91344498  |
| As | -4.50775213 | 1.35874309  | -0.95930110 |
| V  | -2.96320450 | -1.52454028 | -2.21107944 |
| V  | -1.97707778 | -3.42439916 | 0.00000000  |
| V  | -1.78706187 | -1.20876118 | 3.06318385  |
| V  | -2.96320450 | 1.52454028  | 2.21107944  |
| O  | -3.27823460 | 0.42418768  | -1.91344498 |
| O  | -3.38681327 | 2.01524476  | 0.31891033  |
| O  | -1.55662370 | -2.81996319 | -1.81030897 |
| O  | -1.47617930 | -0.71357424 | -3.16142678 |
| O  | -4.08131259 | -2.14483964 | -3.23812351 |
| O  | -2.79340354 | -4.83831686 | 0.00000000  |
| O  | -1.66384791 | -2.75805727 | 1.81030897  |
| O  | -0.05184652 | -3.94068871 | 0.31891033  |
| O  | -2.46627700 | -1.71638959 | 4.46111446  |
| O  | 0.12011623  | -1.63519589 | 3.16142678  |
| O  | -1.47617930 | 0.71357424  | 3.16142678  |
| O  | -4.08131259 | 2.14483964  | 3.23812351  |
| O  | -1.55662370 | 2.81996319  | 1.81030897  |
| V  | -1.78706187 | 1.20876118  | -3.06318385 |
| V  | -1.97707778 | 3.42439916  | 0.00000000  |
| V  | -0.15328696 | -2.15202157 | -3.06318385 |
| V  | 0.16131164  | -3.32848051 | 2.21107944  |
| As | 1.07717003  | -4.58319941 | -0.95930110 |
| V  | 1.94034882  | -0.94326038 | 3.06318385  |
| V  | -0.15328696 | 2.15202157  | 3.06318385  |
| O  | 0.12011623  | 1.63519589  | -3.16142678 |
| O  | -2.46627700 | 1.71638959  | -4.46111446 |
| O  | -1.66384791 | 2.75805727  | -1.81030897 |
| O  | -2.79340354 | 4.83831686  | 0.00000000  |
| O  | -0.05184652 | 3.94068871  | -0.31891033 |
| O  | -0.25329849 | -2.99405333 | -4.46111446 |
| O  | 1.35606307  | -0.92162165 | -3.16142678 |
| O  | 1.27176000  | -3.05112828 | -1.91344498 |
| O  | 0.18317068  | -4.60694021 | 3.23812351  |
| O  | 2.00647461  | -2.62694061 | 1.91344498  |
| O  | 2.64029262  | -4.57312097 | 0.00000000  |
| O  | 2.71957549  | -1.27766373 | 4.46111446  |
| O  | 1.35606307  | 0.92162165  | 3.16142678  |
| O  | 3.22047161  | -0.06190593 | 1.81030897  |
| O  | -0.25329849 | 2.99405333  | 4.46111446  |

|    |            |             |             |
|----|------------|-------------|-------------|
| O  | 1.27176000 | 3.05112828  | 1.91344498  |
| V  | 0.16131164 | 3.32848051  | -2.21107944 |
| V  | 1.94034882 | 0.94326038  | -3.06318385 |
| As | 1.07717003 | 4.58319941  | 0.95930110  |
| V  | 2.80189286 | -1.80394024 | -2.21107944 |
| As | 3.43058210 | -3.22445632 | 0.95930110  |
| V  | 2.80189286 | 1.80394024  | 2.21107944  |
| V  | 3.95415555 | -0.00000000 | 0.00000000  |
| O  | 2.00647461 | 2.62694061  | -1.91344498 |
| O  | 0.18317068 | 4.60694021  | -3.23812351 |
| O  | 3.22047161 | 0.06190593  | -1.81030897 |
| O  | 2.71957549 | 1.27766373  | -4.46111446 |
| O  | 2.64029262 | 4.57312097  | 0.00000000  |
| O  | 3.89814191 | -2.46210057 | -3.23812351 |
| O  | 3.43865979 | -1.92544395 | -0.31891033 |
| O  | 3.89814191 | 2.46210057  | 3.23812351  |
| O  | 3.43865979 | 1.92544395  | 0.31891033  |
| O  | 5.58680708 | -0.00000000 | 0.00000000  |
| As | 3.43058210 | 3.22445632  | -0.95930110 |

$\alpha$ -[V<sub>14</sub>As<sub>8</sub>O<sub>42</sub>]<sup>4-</sup>  
64

|    |             |             |             |
|----|-------------|-------------|-------------|
| As | 0.97429799  | -3.32456173 | 3.20121156  |
| V  | -0.00000000 | 0.00000000  | 3.80552380  |
| V  | 2.04775425  | -2.04775425 | -2.49525411 |
| V  | -0.00000000 | -3.96786925 | -0.00000000 |
| V  | 2.87864494  | -2.87864494 | 0.26429561  |
| O  | 1.49194893  | -3.26631242 | -1.05679583 |
| O  | 1.33130042  | -3.41066070 | 1.42014207  |
| O  | -0.00000000 | -5.59370713 | -0.00000000 |
| O  | -0.14454436 | -1.87157475 | 3.13365128  |
| O  | -4.03326818 | -4.03326818 | -0.28174031 |
| O  | 4.03326818  | -4.03326818 | 0.28174031  |
| O  | 2.49716609  | -2.49716609 | 3.78559669  |
| O  | 2.89463981  | -2.89463981 | -3.59257186 |
| O  | -0.00000000 | 0.00000000  | 5.42255403  |
| O  | 3.26631242  | -1.49194893 | -1.05679583 |
| V  | 3.96786925  | -0.00000000 | -0.00000000 |
| O  | 3.26631242  | 1.49194893  | 1.05679583  |
| V  | 2.04775425  | 2.04775425  | 2.49525411  |
| O  | 1.49194893  | 3.26631242  | 1.05679583  |
| V  | 0.00000000  | 3.96786925  | -0.00000000 |
| O  | -1.49194893 | 3.26631242  | -1.05679583 |
| V  | -2.04775425 | 2.04775425  | -2.49525411 |
| O  | -3.26631242 | 1.49194893  | -1.05679583 |
| V  | -3.96786925 | 0.00000000  | -0.00000000 |
| O  | -3.26631242 | -1.49194893 | 1.05679583  |
| V  | -2.04775425 | -2.04775425 | 2.49525411  |
| O  | -1.49194893 | -3.26631242 | 1.05679583  |
| O  | -1.33130042 | -3.41066070 | -1.42014207 |
| As | -0.97429799 | -3.32456173 | -3.20121156 |
| O  | 0.14454436  | -1.87157475 | -3.13365128 |
| V  | -0.00000000 | 0.00000000  | -3.80552380 |
| O  | -1.87157475 | 0.14454436  | -3.13365128 |
| As | -3.32456173 | -0.97429799 | -3.20121156 |



|    |             |             |             |
|----|-------------|-------------|-------------|
| O  | -3.41066070 | -1.33130042 | -1.42014207 |
| O  | -3.41066070 | 1.33130042  | 1.42014207  |
| As | -3.32456173 | 0.97429799  | 3.20121156  |
| O  | -1.87157475 | -0.14454436 | 3.13365128  |
| As | 3.32456173  | -0.97429799 | 3.20121156  |
| O  | 3.41066070  | -1.33130042 | 1.42014207  |
| O  | 3.41066070  | 1.33130042  | -1.42014207 |
| As | 3.32456173  | 0.97429799  | -3.20121156 |
| O  | 1.87157475  | -0.14454436 | -3.13365128 |
| O  | -0.14454436 | 1.87157475  | -3.13365128 |
| As | 0.97429799  | 3.32456173  | -3.20121156 |
| O  | 1.33130042  | 3.41066070  | -1.42014207 |
| O  | -1.33130042 | 3.41066070  | 1.42014207  |
| As | -0.97429799 | 3.32456173  | 3.20121156  |
| O  | 0.14454436  | 1.87157475  | 3.13365128  |
| O  | 1.87157475  | 0.14454436  | 3.13365128  |
| O  | 5.59370713  | -0.00000000 | -0.00000000 |
| O  | 2.89463981  | 2.89463981  | 3.59257186  |
| O  | -2.49716609 | -2.49716609 | -3.78559669 |
| O  | -2.49716609 | 2.49716609  | 3.78559669  |
| O  | -2.89463981 | -2.89463981 | 3.59257186  |
| V  | -2.87864494 | 2.87864494  | 0.26429561  |
| O  | -4.03326818 | 4.03326818  | 0.28174031  |
| O  | 0.00000000  | 5.59370713  | -0.00000000 |
| V  | 2.87864494  | 2.87864494  | -0.26429561 |
| O  | 4.03326818  | 4.03326818  | -0.28174031 |
| O  | -5.59370713 | 0.00000000  | -0.00000000 |
| O  | 2.49716609  | 2.49716609  | -3.78559669 |
| V  | -2.87864494 | -2.87864494 | -0.26429561 |
| O  | -2.89463981 | 2.89463981  | -3.59257186 |
| O  | -0.00000000 | 0.00000000  | -5.42255403 |

$\beta$ -[V<sub>14</sub>As<sub>8</sub>O<sub>42</sub>]<sup>4-</sup>  
64

|    |             |             |             |
|----|-------------|-------------|-------------|
| As | 4.28231729  | 0.00000000  | -1.64496253 |
| O  | 1.37700559  | 3.09148680  | 1.42886997  |
| As | -4.28231729 | 0.00000000  | 1.64496253  |
| O  | -3.09148680 | -1.37700559 | -1.42886997 |
| As | 4.28231729  | 0.00000000  | 1.64496253  |
| O  | -3.09148680 | 1.37700559  | -1.42886997 |
| As | -4.28231729 | 0.00000000  | -1.64496253 |
| O  | 2.72336556  | -2.72336556 | -4.04150907 |
| As | 0.00000000  | -4.28231729 | -1.64496253 |
| O  | -1.37700559 | 3.09148680  | 1.42886997  |
| As | 0.00000000  | 4.28231729  | 1.64496253  |
| O  | -3.09148680 | 1.37700559  | 1.42886997  |
| As | 0.00000000  | -4.28231729 | 1.64496253  |
| O  | 1.79165124  | 0.00000000  | 3.51947228  |
| As | 0.00000000  | 4.28231729  | -1.64496253 |
| O  | 0.00000000  | -1.79165124 | 3.51947228  |
| V  | 1.87446231  | 1.87446231  | -2.94687360 |
| O  | 0.00000000  | 1.79165124  | 3.51947228  |
| V  | -1.87446231 | -1.87446231 | 2.94687360  |
| O  | 0.00000000  | -5.07656412 | 0.00000000  |
| V  | 2.69740044  | 2.69740044  | 0.00000000  |
| O  | -1.37700559 | -3.09148680 | -1.42886997 |

|   |             |             |             |
|---|-------------|-------------|-------------|
| V | -2.69740044 | -2.69740044 | 0.00000000  |
| O | 3.84029786  | -3.84029786 | 0.00000000  |
| V | 1.87446231  | 1.87446231  | 2.94687360  |
| O | 0.00000000  | 1.79165124  | -3.51947228 |
| V | -1.87446231 | -1.87446231 | -2.94687360 |
| O | -2.72336556 | 2.72336556  | -4.04150907 |
| V | -1.87446231 | 1.87446231  | 2.94687360  |
| O | 3.09148680  | -1.37700559 | -1.42886997 |
| V | 1.87446231  | -1.87446231 | -2.94687360 |
| O | 2.72336556  | 2.72336556  | 4.04150907  |
| V | 0.00000000  | 0.00000000  | 4.30879886  |
| O | -1.79165124 | 0.00000000  | -3.51947228 |
| V | 0.00000000  | 0.00000000  | -4.30879886 |
| O | 0.00000000  | 0.00000000  | 5.95404641  |
| V | 1.87446231  | -1.87446231 | 2.94687360  |
| O | 0.00000000  | 0.00000000  | -5.95404641 |
| V | -1.87446231 | 1.87446231  | -2.94687360 |
| O | -1.79165124 | 0.00000000  | 3.51947228  |
| V | 2.69740044  | -2.69740044 | 0.00000000  |
| O | 3.09148680  | -1.37700559 | 1.42886997  |
| V | -2.69740044 | 2.69740044  | 0.00000000  |
| O | 1.37700559  | -3.09148680 | -1.42886997 |
| O | 5.07656412  | 0.00000000  | 0.00000000  |
| O | 1.37700559  | -3.09148680 | 1.42886997  |
| O | -5.07656412 | 0.00000000  | 0.00000000  |
| O | 1.79165124  | 0.00000000  | -3.51947228 |
| O | 3.09148680  | 1.37700559  | -1.42886997 |
| O | 0.00000000  | -1.79165124 | -3.51947228 |
| O | -3.09148680 | -1.37700559 | 1.42886997  |
| O | 0.00000000  | 5.07656412  | 0.00000000  |
| O | 2.72336556  | 2.72336556  | -4.04150907 |
| O | -2.72336556 | -2.72336556 | -4.04150907 |
| O | -2.72336556 | -2.72336556 | 4.04150907  |
| O | -2.72336556 | 2.72336556  | 4.04150907  |
| O | 1.37700559  | 3.09148680  | -1.42886997 |
| O | 2.72336556  | -2.72336556 | 4.04150907  |
| O | -1.37700559 | -3.09148680 | 1.42886997  |
| O | -3.84029786 | 3.84029786  | 0.00000000  |
| O | 3.84029786  | 3.84029786  | 0.00000000  |
| O | -1.37700559 | 3.09148680  | -1.42886997 |
| O | -3.84029786 | -3.84029786 | 0.00000000  |
| O | 3.09148680  | 1.37700559  | 1.42886997  |

[V<sub>6</sub>As<sub>8</sub>O<sub>26</sub>]<sup>4-</sup>  
40

|    |             |             |             |
|----|-------------|-------------|-------------|
| As | 3.33943286  | -1.01407099 | 1.70622261  |
| O  | 1.85976182  | 0.14387383  | 1.67633939  |
| O  | 3.47489091  | -1.52951617 | 0.02570091  |
| O  | 2.43732153  | -2.43732153 | 2.49193280  |
| V  | 0.00000000  | 0.00000000  | 2.33648244  |
| V  | 2.08328934  | 2.08328934  | 1.21712092  |
| V  | 2.08328934  | -2.08328934 | -1.21712092 |
| As | 1.01407099  | -3.33943286 | 1.70622261  |
| O  | 0.00000000  | 0.00000000  | 3.96924940  |
| O  | -1.85976182 | -0.14387383 | 1.67633939  |
| O  | -0.14387383 | -1.85976182 | 1.67633939  |

|    |             |             |             |
|----|-------------|-------------|-------------|
| O  | 0.14387383  | 1.85976182  | 1.67633939  |
| O  | 2.84935759  | 2.84935759  | 2.44095288  |
| O  | 3.47489091  | 1.52951617  | -0.02570091 |
| O  | 1.52951617  | 3.47489091  | -0.02570091 |
| O  | 1.85976182  | -0.14387383 | -1.67633939 |
| O  | 0.14387383  | -1.85976182 | -1.67633939 |
| O  | 2.84935759  | -2.84935759 | -2.44095288 |
| O  | 1.52951617  | -3.47489091 | 0.02570091  |
| As | -3.33943286 | 1.01407099  | 1.70622261  |
| V  | -2.08328934 | -2.08328934 | 1.21712092  |
| As | -1.01407099 | 3.33943286  | 1.70622261  |
| As | 3.33943286  | 1.01407099  | -1.70622261 |
| As | 1.01407099  | 3.33943286  | -1.70622261 |
| V  | 0.00000000  | 0.00000000  | -2.33648244 |
| As | -1.01407099 | -3.33943286 | -1.70622261 |
| O  | -3.47489091 | 1.52951617  | 0.02570091  |
| O  | -2.43732153 | 2.43732153  | 2.49193280  |
| O  | -2.84935759 | -2.84935759 | 2.44095288  |
| O  | -3.47489091 | -1.52951617 | -0.02570091 |
| O  | -1.52951617 | -3.47489091 | -0.02570091 |
| O  | -1.52951617 | 3.47489091  | 0.02570091  |
| O  | 2.43732153  | 2.43732153  | -2.49193280 |
| O  | -0.14387383 | 1.85976182  | -1.67633939 |
| O  | 0.00000000  | 0.00000000  | -3.96924940 |
| O  | -1.85976182 | 0.14387383  | -1.67633939 |
| O  | -2.43732153 | -2.43732153 | -2.49193280 |
| V  | -2.08328934 | 2.08328934  | -1.21712092 |
| As | -3.33943286 | -1.01407099 | -1.70622261 |
| O  | -2.84935759 | 2.84935759  | -2.44095288 |

$\zeta$ -[V<sub>10</sub>As<sub>12</sub>O<sub>40</sub>]<sup>4-</sup> (i.e. *anti*-1,1)  
62

|    |             |             |             |
|----|-------------|-------------|-------------|
| O  | -0.00000000 | -3.64796208 | 3.69889010  |
| As | 1.66549975  | 2.98758673  | 4.04091703  |
| As | -2.97654079 | 3.06227310  | -1.87585799 |
| O  | 2.29551203  | 3.64662697  | 2.47067776  |
| O  | -1.32305146 | 3.47493875  | -2.21696495 |
| As | 3.65820716  | 3.02023639  | 1.40334879  |
| V  | 0.00000000  | 2.73627424  | -3.47707395 |
| As | 2.97654079  | 3.06227310  | -1.87585799 |
| O  | -2.29551203 | 3.64662697  | 2.47067776  |
| O  | 2.86432660  | 3.64244613  | -0.07685563 |
| O  | 1.32305146  | 3.47493875  | -2.21696495 |
| O  | 0.00000000  | 3.72803291  | -4.78489634 |
| O  | -3.13999461 | 1.23342094  | 1.29369784  |
| O  | -2.84376391 | 1.22312858  | -1.56573266 |
| O  | 0.00000000  | 3.64796208  | 3.69889010  |
| O  | -1.26574691 | 1.26138973  | -3.90473607 |
| O  | 1.26574691  | 1.26138973  | -3.90473607 |
| As | -1.66549975 | 2.98758673  | 4.04091703  |
| O  | 2.84376391  | 1.22312858  | -1.56573266 |
| O  | 3.13999461  | 1.23342094  | 1.29369784  |
| As | -3.65820716 | 3.02023639  | 1.40334879  |
| O  | -1.41548869 | 1.22475338  | 3.55071146  |
| O  | 1.41548869  | 1.22475338  | 3.55071146  |
| V  | -3.62259099 | 0.00000000  | -0.22417226 |

|    |             |             |             |
|----|-------------|-------------|-------------|
| V  | -2.82052290 | 0.00000000  | 2.81289317  |
| V  | -2.54081746 | 0.00000000  | -3.14413113 |
| V  | -0.00000000 | -0.00000000 | -4.68824548 |
| V  | 2.54081746  | -0.00000000 | -3.14413113 |
| V  | 3.62259099  | -0.00000000 | -0.22417226 |
| V  | 2.82052290  | -0.00000000 | 2.81289317  |
| V  | -0.00000000 | -0.00000000 | 4.23063112  |
| O  | -5.23908850 | 0.00000000  | -0.37221074 |
| O  | -3.13999461 | -1.23342094 | 1.29369784  |
| O  | -2.84376391 | -1.22312858 | -1.56573266 |
| O  | -4.10395041 | 0.00000000  | 3.79866395  |
| O  | -1.41548869 | -1.22475338 | 3.55071146  |
| O  | -3.89497927 | 0.00000000  | -4.06659667 |
| O  | -1.26574691 | -1.26138973 | -3.90473607 |
| O  | -0.00000000 | -0.00000000 | -6.34971343 |
| O  | 1.26574691  | -1.26138973 | -3.90473607 |
| O  | 3.89497927  | -0.00000000 | -4.06659667 |
| O  | 2.84376391  | -1.22312858 | -1.56573266 |
| O  | 5.23908850  | -0.00000000 | -0.37221074 |
| O  | 3.13999461  | -1.23342094 | 1.29369784  |
| O  | 4.10395041  | -0.00000000 | 3.79866395  |
| O  | 1.41548869  | -1.22475338 | 3.55071146  |
| O  | -0.00000000 | -0.00000000 | 5.84777314  |
| O  | 2.29551203  | -3.64662697 | 2.47067776  |
| O  | 2.86432660  | -3.64244613 | -0.07685563 |
| As | -2.97654079 | -3.06227310 | -1.87585799 |
| As | -1.66549975 | -2.98758673 | 4.04091703  |
| As | 2.97654079  | -3.06227310 | -1.87585799 |
| O  | -2.29551203 | -3.64662697 | 2.47067776  |
| O  | 1.32305146  | -3.47493875 | -2.21696495 |
| As | -3.65820716 | -3.02023639 | 1.40334879  |
| V  | -0.00000000 | -2.73627424 | -3.47707395 |
| O  | -2.86432660 | 3.64244613  | -0.07685563 |
| O  | -2.86432660 | -3.64244613 | -0.07685563 |
| O  | -1.32305146 | -3.47493875 | -2.21696495 |
| O  | -0.00000000 | -3.72803291 | -4.78489634 |
| As | 1.66549975  | -2.98758673 | 4.04091703  |
| As | 3.65820716  | -3.02023639 | 1.40334879  |

$\epsilon$ -[V<sub>10</sub>As<sub>12</sub>O<sub>40</sub>]<sup>4-</sup> (i.e. *anti*-1,2)  
62

|    |             |             |             |
|----|-------------|-------------|-------------|
| O  | 0.16160412  | -3.37051482 | 4.68210857  |
| As | -1.78654754 | 3.09451827  | 3.98417369  |
| As | -0.55901988 | 3.35246200  | -3.08380643 |
| O  | -0.67645734 | 3.39802932  | 2.56224683  |
| O  | 0.95727133  | 3.34452531  | -2.21209750 |
| As | 1.11298530  | 3.19392862  | 2.94839124  |
| V  | 2.67189578  | 2.55287067  | -2.60212163 |
| As | 3.39350804  | 2.96059529  | 0.78883771  |
| O  | -3.19253536 | 3.55501681  | 0.50598212  |
| O  | 1.58660078  | 3.37632597  | 1.24040372  |
| O  | 3.33684927  | 3.37503170  | -0.87562385 |
| O  | 3.58658692  | 3.44711354  | -3.63164335 |
| O  | -3.50834443 | 1.09187283  | 1.69463050  |
| O  | -2.86357860 | 1.28383699  | -1.08814260 |
| O  | -3.40142623 | 3.42338255  | 3.22239994  |

|    |             |             |             |
|----|-------------|-------------|-------------|
| O  | -0.96127331 | 1.54898616  | -3.26538638 |
| O  | 1.85622072  | 1.24580868  | -3.86671433 |
| As | -4.26198570 | 2.76490160  | 1.74935448  |
| O  | 3.49476048  | 0.86857679  | -2.02915623 |
| O  | 3.02577062  | 1.11512079  | 0.77088433  |
| As | -3.24543686 | 3.08190022  | -1.27526116 |
| O  | -1.69573649 | 1.25316005  | 3.87521090  |
| O  | 1.13360131  | 1.31260148  | 3.05716108  |
| V  | -3.60666789 | -0.12243802 | 0.08790086  |
| V  | -2.95665162 | -0.10985959 | 3.18830121  |
| V  | -2.33776668 | 0.20064254  | -2.73979476 |
| V  | 0.20442036  | 0.38847473  | -4.43078427 |
| V  | 2.94133967  | -0.32945476 | -3.48509511 |
| V  | 3.70119868  | -0.27349775 | -0.49369505 |
| V  | 2.57665750  | 0.07573752  | 2.41404135  |
| V  | -0.00793917 | 0.19201775  | 4.24925644  |
| O  | -5.18529003 | -0.34935299 | -0.20208464 |
| O  | -3.02970176 | -1.30648286 | 1.60041732  |
| O  | -2.61273015 | -1.14182831 | -1.29845875 |
| O  | -4.23371370 | -0.33272394 | 4.15737225  |
| O  | -1.44147147 | -1.15716648 | 3.99253348  |
| O  | -3.64922206 | 0.29687899  | -3.70726677 |
| O  | -1.05871458 | -0.89528902 | -3.66420116 |
| O  | -0.10206700 | 0.70431124  | -6.02202155 |
| O  | 1.34478872  | -1.17183551 | -4.22397819 |
| O  | 4.19363471  | -0.54763283 | -4.53723489 |
| O  | 3.06295431  | -1.56147448 | -1.91177116 |
| O  | 5.29724605  | -0.49679550 | -0.24620922 |
| O  | 2.75714809  | -1.29305960 | 1.00327350  |
| O  | 3.90374758  | 0.19680279  | 3.33757038  |
| O  | 1.33270432  | -1.07475416 | 3.53095359  |
| O  | 0.34017895  | 0.44748025  | 5.80867261  |
| O  | 1.45270677  | -3.43940433 | 2.22450440  |
| O  | 1.89911653  | -3.51735514 | -0.37082639 |
| As | -2.55647161 | -2.99934942 | -1.62438962 |
| As | -1.58610439 | -2.94478153 | 4.40336179  |
| As | 2.88774042  | -3.42437146 | -1.98946565 |
| O  | -1.71757558 | -3.55101184 | 2.68637577  |
| O  | 1.58469394  | -3.65001088 | -3.09960608 |
| As | -3.12934572 | -3.17409395 | 1.57385689  |
| V  | 0.03413957  | -2.54722423 | -3.71902938 |
| O  | -1.57280908 | 3.68296392  | -1.53604117 |
| O  | -2.11633346 | -3.48155092 | 0.13117227  |
| O  | -0.93264104 | -3.24545796 | -2.17938326 |
| O  | -0.44011731 | -3.34836842 | -5.06957035 |
| As | 1.72522779  | -2.82368839 | 3.92353177  |
| As | 2.86837739  | -3.14504632 | 1.08597984  |

$\delta$ -[V<sub>10</sub>As<sub>12</sub>O<sub>40</sub>]<sup>4-</sup> (i.e. *anti*-1,3)  
62

|    |             |             |             |
|----|-------------|-------------|-------------|
| O  | 0.14439799  | -3.31148394 | 4.75527636  |
| As | -3.73539256 | 2.95089873  | 1.59545100  |
| As | 1.26619465  | 3.23880898  | -2.40195338 |
| O  | -2.09988765 | 3.64546449  | 2.00727211  |
| O  | 1.73234165  | 3.04206861  | -0.73010682 |
| As | -1.07885545 | 3.18366142  | 3.45298995  |

|    |             |             |             |
|----|-------------|-------------|-------------|
| V  | 3.37202802  | 2.33178363  | 0.01449790  |
| As | 2.16048702  | 3.05304362  | 3.20234105  |
| O  | -3.26348162 | 3.72048649  | -2.77359243 |
| O  | 0.44213370  | 3.54157845  | 2.57282916  |
| O  | 2.99885556  | 3.33078155  | 1.72840283  |
| O  | 4.69609374  | 3.17423729  | -0.45542539 |
| O  | -3.20475153 | 1.20416738  | 1.31768660  |
| O  | -3.40495897 | 1.20814899  | -1.51425232 |
| O  | -3.57947624 | 3.58775051  | -0.09988747 |
| O  | -1.73947110 | 1.56974064  | -3.78013464 |
| O  | 1.23804227  | 1.48737195  | -3.09691927 |
| As | -4.29799572 | 2.80430317  | -1.59546417 |
| O  | 3.34666240  | 0.85242657  | -1.30254657 |
| O  | 3.77862410  | 0.75035957  | 1.12906869  |
| As | -1.62435451 | 3.37410349  | -3.52355821 |
| O  | -1.07063033 | 1.33710541  | 3.23018137  |
| O  | 1.82561112  | 1.18568620  | 3.13682348  |
| V  | -3.71313448 | -0.14171435 | -0.06880053 |
| V  | -2.56540846 | 0.09890838  | 2.86633078  |
| V  | -2.84643990 | 0.05331344  | -3.09174925 |
| V  | -0.06034293 | 0.52637390  | -4.27957399 |
| V  | 2.60986774  | 0.02490797  | -2.89509118 |
| V  | 4.00168853  | -0.61047756 | -0.24856691 |
| V  | 3.17625161  | -0.19988554 | 2.69621202  |
| V  | 0.36744462  | 0.22152116  | 4.08541694  |
| O  | -5.30864916 | -0.41378665 | -0.01933981 |
| O  | -2.90527577 | -1.22490302 | 1.43408600  |
| O  | -2.90370628 | -1.19976018 | -1.53856252 |
| O  | -3.76275180 | 0.20837353  | 3.95176280  |
| O  | -1.15717947 | -1.02877123 | 3.76257101  |
| O  | -4.15540704 | -0.16329428 | -4.03798934 |
| O  | -1.35188801 | -0.86294144 | -3.87940580 |
| O  | 0.17304048  | 0.82702194  | -5.87756920 |
| O  | 1.11694730  | -0.90760686 | -3.73716181 |
| O  | 3.75640635  | 0.16567647  | -4.05911777 |
| O  | 2.99104114  | -1.55232517 | -1.71586151 |
| O  | 5.60048436  | -0.90953211 | -0.47757699 |
| O  | 3.30866016  | -1.66905877 | 1.33440072  |
| O  | 4.42469078  | -0.19655436 | 3.74211908  |
| O  | 1.68867134  | -1.19488080 | 3.69544852  |
| O  | 0.42681749  | 0.63045293  | 5.65271441  |
| O  | 1.59308690  | -3.61115244 | 2.44642276  |
| O  | 1.89829602  | -3.52128157 | -0.15084834 |
| As | -2.85074632 | -3.09049285 | -1.68383507 |
| As | -1.51046869 | -2.75626004 | 4.24748010  |
| As | 2.68974964  | -3.38338295 | -1.86099241 |
| O  | -1.50353886 | -3.41577256 | 2.53303638  |
| O  | 1.21777887  | -3.51214079 | -2.76822527 |
| As | -2.92679680 | -3.10396111 | 1.43286926  |
| V  | -0.11279830 | -2.42805753 | -3.73039415 |
| O  | -0.57349808 | 3.32502178  | -2.03939945 |
| O  | -1.93871966 | -3.31715612 | -0.05314560 |
| O  | -1.49767726 | -3.38717014 | -2.70936018 |
| O  | -0.12659631 | -3.08109296 | -5.23302814 |
| As | 1.82799445  | -2.96592010 | 4.13421905  |
| As | 2.99988925  | -3.49473118 | 1.27152552  |

$\beta$ -[V<sub>10</sub>As<sub>12</sub>O<sub>40</sub>]<sup>4-</sup> (i.e. *anti*-1,4)  
62

|    |             |             |             |
|----|-------------|-------------|-------------|
| V  | 1.06438846  | -3.12739288 | -3.00354663 |
| O  | 2.55341122  | -2.97734730 | -1.78762094 |
| O  | 1.54531392  | -1.27039363 | -3.28753495 |
| O  | 0.57640481  | -4.41322909 | -1.51237603 |
| O  | -0.71188711 | -2.22130232 | -3.08181069 |
| V  | -1.66374992 | 2.95950851  | 2.66338504  |
| V  | 1.97017527  | -3.85906048 | -0.17405888 |
| O  | -2.37775191 | 3.69805953  | 3.92664135  |
| V  | -0.14303078 | -0.36296133 | -3.58866165 |
| O  | 0.10508327  | 2.21193305  | 3.23927720  |
| As | -0.97896191 | -5.38465134 | -1.46890352 |
| As | -2.38202502 | -3.00851904 | -3.02730723 |
| O  | 2.52260079  | -2.30983956 | 0.94626406  |
| O  | 0.55000792  | -3.70468563 | 1.23596336  |
| As | -3.73013281 | 0.27834717  | 2.80055108  |
| O  | 1.37794068  | -4.01002973 | -4.34897436 |
| O  | -3.24264443 | -1.40439784 | 2.11164362  |
| O  | 0.53606557  | 1.32759046  | -2.81761780 |
| O  | -1.74762283 | 0.50296416  | -2.72244708 |
| O  | 2.94303072  | -5.12097724 | 0.15669178  |
| O  | -2.80137102 | 3.09796131  | 1.11305919  |
| O  | -1.08467574 | -5.81572179 | 0.31472137  |
| O  | -2.15101896 | -3.97482423 | -1.46727791 |
| O  | -3.28554027 | -1.72070489 | -2.14317814 |
| V  | 1.22706437  | -2.26760141 | 2.44988096  |
| O  | -0.70442080 | 4.29031329  | 1.51507504  |
| As | -0.67212004 | -4.92018187 | 1.85098545  |
| V  | -1.15919782 | 2.37883224  | -2.59937638 |
| O  | -4.41160962 | 0.85776526  | 1.31444434  |
| As | -3.54776530 | 0.00020186  | -2.86369705 |
| O  | -0.60213148 | -1.59896467 | 2.83894266  |
| O  | 1.46698145  | -0.31269423 | 2.81601599  |
| O  | -0.37085161 | 0.10663695  | 5.14418191  |
| O  | -5.29231147 | 3.04952019  | -0.31307657 |
| O  | -2.11032127 | -3.76534686 | 1.85036797  |
| O  | -2.57763118 | 2.82289612  | -1.34954638 |
| O  | -0.26990958 | 3.68994109  | -1.35351796 |
| O  | 1.84185691  | -3.03108529 | 3.74107822  |
| O  | -2.44125138 | 5.62527852  | -0.47906962 |
| O  | -4.26311916 | 0.63009185  | -1.40371926 |
| V  | -0.28913944 | 0.26285972  | 3.53223304  |
| As | -2.23100861 | -2.47812230 | 3.14802925  |
| O  | -1.47293290 | 3.13761622  | -4.00718933 |
| V  | -1.80633330 | 4.14668336  | -0.16430091 |
| V  | -3.97252356 | 2.09799567  | -0.14462388 |
| O  | -0.32848479 | -0.19396137 | -5.19972788 |
| O  | -1.96751043 | 0.99669835  | 2.78754709  |
| As | 1.63965060  | 2.99448404  | 3.88601851  |
| As | 2.31804965  | 1.83910384  | -3.10248451 |
| O  | 2.77595467  | 2.17002917  | 2.69062459  |
| O  | 3.19456404  | 0.64974498  | -2.15264066 |
| As | 3.18690999  | 0.41377646  | 3.02609079  |
| V  | 3.33380994  | -1.25067986 | -2.41045757 |
| As | 4.29393225  | -1.62320800 | 0.87243449  |

|    |            |             |             |
|----|------------|-------------|-------------|
| O  | 1.80160281 | 4.44729926  | 0.36639594  |
| O  | 3.76793564 | 0.13660438  | 1.34770869  |
| O  | 4.52032982 | -1.33675188 | -0.81564108 |
| O  | 4.38872413 | -1.55987570 | -3.62233548 |
| O  | 1.59923785 | 4.64215356  | 3.11416126  |
| As | 0.79121336 | 5.32673030  | 1.60955563  |
| As | 1.37599055 | 4.51670404  | -1.43043301 |
| O  | 2.45183320 | 3.10659884  | -1.74538188 |

$\alpha$ -[V<sub>10</sub>As<sub>12</sub>O<sub>40</sub>]<sup>4-</sup> (i.e. *anti*-1,5)

|    |             |             |             |
|----|-------------|-------------|-------------|
| 62 |             |             |             |
| V  | 1.29047794  | -2.76629225 | -2.53708467 |
| O  | 2.67424619  | -3.08089665 | -1.24117264 |
| O  | 1.69937035  | -0.81608534 | -2.57713254 |
| O  | 0.53791802  | -4.31218148 | -1.44917363 |
| O  | -0.49336274 | -1.85531113 | -2.63608353 |
| V  | -1.29047794 | 2.76629225  | 2.53708467  |
| V  | 1.91280703  | -4.36672457 | -0.00000000 |
| O  | -1.70759163 | 3.37285759  | 3.98933847  |
| V  | 0.00000000  | 0.00000000  | -3.20995337 |
| As | 3.47384198  | -0.22776377 | -2.81301758 |
| As | -0.99973026 | -5.28486495 | -1.68900483 |
| As | -2.11640077 | -2.66927615 | -3.04336655 |
| O  | 2.67424619  | -3.08089665 | 1.24117264  |
| O  | 0.53791802  | -4.31218148 | 1.44917363  |
| As | -3.47384198 | 0.22776377  | 2.81301758  |
| O  | 5.29606958  | -3.05431659 | -0.00000000 |
| O  | 4.24185401  | -0.77605394 | -1.35249918 |
| O  | 0.49336274  | 1.85531113  | -2.63608353 |
| O  | -1.69937035 | 0.81608534  | -2.57713254 |
| As | 2.11640077  | 2.66927615  | 3.04336655  |
| O  | 3.18972746  | 1.51729947  | -2.16382633 |
| O  | -1.29858964 | -5.92059398 | -0.00000000 |
| O  | -2.16762834 | -3.86497065 | -1.64701917 |
| O  | -3.18972746 | -1.51729947 | -2.16382633 |
| V  | 1.29047794  | -2.76629225 | 2.53708467  |
| V  | 3.93183793  | -2.15418058 | -0.00000000 |
| As | -0.99973026 | -5.28486495 | 1.68900483  |
| V  | -1.29047794 | 2.76629225  | -2.53708467 |
| As | 2.11640077  | 2.66927615  | -3.04336655 |
| As | -3.47384198 | 0.22776377  | -2.81301758 |
| O  | -0.49336274 | -1.85531113 | 2.63608353  |
| O  | 1.69937035  | -0.81608534 | 2.57713254  |
| O  | 0.00000000  | 0.00000000  | 4.83225705  |
| O  | 4.24185401  | -0.77605394 | 1.35249918  |
| O  | -2.16762834 | -3.86497065 | 1.64701917  |
| O  | -2.67424619 | 3.08089665  | -1.24117264 |
| O  | -0.53791802 | 4.31218148  | -1.44917363 |
| As | 0.99973026  | 5.28486495  | 1.68900483  |
| O  | 2.16762834  | 3.86497065  | -1.64701917 |
| O  | -4.24185401 | 0.77605394  | -1.35249918 |
| V  | 0.00000000  | 0.00000000  | 3.20995337  |
| As | -2.11640077 | -2.66927615 | 3.04336655  |
| As | 3.47384198  | -0.22776377 | 2.81301758  |
| V  | -1.91280703 | 4.36672457  | -0.00000000 |
| V  | -3.93183793 | 2.15418058  | -0.00000000 |
| As | 0.99973026  | 5.28486495  | -1.68900483 |



|   |             |             |             |
|---|-------------|-------------|-------------|
| O | -1.69937035 | 0.81608534  | 2.57713254  |
| O | 0.49336274  | 1.85531113  | 2.63608353  |
| O | 2.16762834  | 3.86497065  | 1.64701917  |
| O | -3.18972746 | -1.51729947 | 2.16382633  |
| O | 3.18972746  | 1.51729947  | 2.16382633  |
| O | -2.67424619 | 3.08089665  | 1.24117264  |
| O | -0.53791802 | 4.31218148  | 1.44917363  |
| O | -4.24185401 | 0.77605394  | 1.35249918  |
| O | -5.29606958 | 3.05431659  | -0.00000000 |
| O | 1.29858964  | 5.92059398  | -0.00000000 |
| O | -2.73407567 | 5.78395681  | -0.00000000 |
| O | -1.70759163 | 3.37285759  | -3.98933847 |
| O | 0.00000000  | 0.00000000  | -4.83225705 |
| O | 1.70759163  | -3.37285759 | -3.98933847 |
| O | 2.73407567  | -5.78395681 | -0.00000000 |
| O | 1.70759163  | -3.37285759 | 3.98933847  |

$\eta$ -[V<sub>10</sub>As<sub>12</sub>O<sub>40</sub>]<sup>4-</sup> (i.e. *syn*-1,3)  
62

|    |             |             |             |
|----|-------------|-------------|-------------|
| V  | -2.68399240 | 2.70695621  | 0.19187233  |
| O  | -1.31419435 | 3.07613743  | -1.10432181 |
| O  | -3.31275958 | 1.17661330  | 1.37162650  |
| O  | -1.12363217 | 3.30248932  | 1.34247582  |
| O  | -3.07928646 | 1.31589401  | -1.09607646 |
| O  | -3.83831089 | 3.87470925  | 0.19371666  |
| V  | 0.11476939  | 3.96000257  | -0.14321190 |
| O  | 2.75854908  | -2.63402162 | -3.64495793 |
| V  | -4.02436821 | -0.02711827 | -0.07897810 |
| As | -3.30633955 | 1.11686655  | 3.20235104  |
| As | -1.11122837 | 3.31729209  | 3.17098228  |
| O  | 3.82449272  | -3.78358123 | 0.26230950  |
| O  | 1.48997908  | 3.25569618  | -1.29409660 |
| O  | 1.75924758  | 3.82261182  | 1.09822215  |
| O  | -0.08388439 | 5.56665576  | -0.39010264 |
| V  | 1.81348372  | 1.88108227  | -2.69870886 |
| As | -1.55900543 | -3.86694701 | -3.24303123 |
| O  | -3.76688429 | -1.71175557 | 1.03222386  |
| O  | -3.49791175 | -1.44122396 | -1.36509115 |
| O  | -5.62908578 | 0.23652207  | -0.21664400 |
| O  | -2.96785713 | -0.66862926 | 3.41682547  |
| O  | -1.53986184 | 1.54784507  | 3.42476942  |
| O  | 0.66035656  | 2.98625793  | 3.45288523  |
| V  | -1.72632174 | 1.80326874  | -2.56037166 |
| V  | 3.08432912  | 3.10875011  | -0.21675782 |
| O  | 1.52078299  | -1.53352711 | 3.33797922  |
| As | 1.85277761  | 4.25943569  | 2.84814163  |
| V  | -3.13278023 | -3.05698662 | -0.30229641 |
| As | -4.24173696 | -1.83515207 | 2.78407303  |
| O  | 0.02532507  | 1.89723396  | -3.14488627 |
| O  | 3.27999257  | 1.49570047  | -1.29719012 |
| O  | 3.84527982  | 1.82068369  | 1.11212373  |
| O  | 4.19645032  | 4.24903805  | -0.61517198 |
| O  | -2.72221611 | -2.61687347 | -3.81131352 |
| O  | 3.37852833  | 3.40528475  | 3.38384795  |
| O  | -1.79352801 | -3.76681178 | 0.99237787  |
| O  | -1.54680111 | -3.51833249 | -1.42716966 |

|                                                                                            |             |             |             |
|--------------------------------------------------------------------------------------------|-------------|-------------|-------------|
| O                                                                                          | -4.29709063 | -4.16301253 | -0.56092124 |
| O                                                                                          | -3.41246729 | -3.38617592 | 3.27319603  |
| O                                                                                          | 0.02010325  | -3.00473530 | -3.63050496 |
| V                                                                                          | 4.05553940  | 0.19955969  | -0.10699155 |
| As                                                                                         | 1.55990639  | -3.82899469 | -3.03104107 |
| As                                                                                         | 4.23909375  | 1.88427281  | 2.87353172  |
| V                                                                                          | -0.13048012 | -4.06121092 | -0.13838974 |
| As                                                                                         | -1.88617487 | -4.22749779 | 2.75219310  |
| O                                                                                          | 1.81042031  | -0.04921381 | -3.12848358 |
| O                                                                                          | 3.37950634  | -1.30457814 | -1.22652547 |
| O                                                                                          | 3.21757999  | -1.06772800 | 1.21503922  |
| O                                                                                          | 5.68016936  | 0.06832665  | -0.22190138 |
| O                                                                                          | -1.71443623 | -0.11157285 | -3.05835971 |
| O                                                                                          | 2.94039709  | 0.66564266  | 3.39339237  |
| O                                                                                          | 1.08191380  | -3.15337585 | 1.16282895  |
| O                                                                                          | 1.36519060  | -3.32103729 | -1.27054116 |
| O                                                                                          | 0.08860401  | -5.67989938 | -0.14783396 |
| O                                                                                          | -0.68232168 | -2.94628180 | 3.32354789  |
| As                                                                                         | 3.30426324  | -0.93767980 | -3.06913382 |
| V                                                                                          | 2.69165755  | -2.63714078 | 0.04227009  |
| As                                                                                         | -3.24128007 | -0.93831622 | -3.15241397 |
| As                                                                                         | 3.27845433  | -1.08748304 | 3.06352597  |
| As                                                                                         | 1.07984660  | -3.27626937 | 3.01534499  |
| O                                                                                          | 2.61191802  | 2.64435943  | -3.91583924 |
| O                                                                                          | -2.62449607 | 2.60462814  | -3.68065833 |
| Y-[V <sub>10</sub> As <sub>12</sub> O <sub>40</sub> ] <sup>4-</sup> (i.e. <i>syn</i> -1,5) |             |             |             |
| 62                                                                                         |             |             |             |
| V                                                                                          | -2.62202146 | 3.01846721  | -0.16995966 |
| O                                                                                          | -1.23910945 | 3.89472589  | -1.17713609 |
| O                                                                                          | -2.92649650 | 1.41785111  | 1.01177751  |
| O                                                                                          | -1.46762908 | 3.83828409  | 1.27927716  |
| O                                                                                          | -2.69161959 | 1.48487456  | -1.41472021 |
| O                                                                                          | -4.01191491 | 3.86180112  | -0.26246849 |
| V                                                                                          | 0.00000000  | 4.59002779  | 0.13560102  |
| V                                                                                          | 0.00000000  | 3.70064783  | -2.72403946 |
| V                                                                                          | -3.41604963 | -0.00000000 | -0.32132411 |
| As                                                                                         | -3.73089395 | 1.59624308  | 2.65448208  |
| As                                                                                         | -1.64440388 | 4.08340158  | 3.08229447  |
| As                                                                                         | -2.67735125 | 1.57341061  | -3.32916148 |
| O                                                                                          | 1.23910945  | 3.89472589  | -1.17713609 |
| O                                                                                          | 1.46762908  | 3.83828409  | 1.27927716  |
| O                                                                                          | 0.00000000  | 6.22596304  | 0.20805696  |
| O                                                                                          | 1.37256665  | -2.67348336 | -3.66068952 |
| O                                                                                          | -1.37256665 | 2.67348336  | -3.66068952 |
| O                                                                                          | -2.92649650 | -1.41785111 | 1.01177751  |
| O                                                                                          | -2.69161959 | -1.48487456 | -1.41472021 |
| O                                                                                          | -5.03308490 | -0.00000000 | -0.45709594 |
| O                                                                                          | -3.18813738 | -0.00000000 | 3.38169537  |
| O                                                                                          | -2.40247302 | 2.47276789  | 3.55323810  |
| O                                                                                          | 0.00000000  | 3.49004118  | 3.63981276  |
| O                                                                                          | -1.72809201 | 0.00000000  | -3.53057017 |
| V                                                                                          | 2.62202146  | 3.01846721  | -0.16995966 |
| O                                                                                          | 2.40247302  | -2.47276789 | 3.55323810  |
| As                                                                                         | 1.64440388  | 4.08340158  | 3.08229447  |
| V                                                                                          | -2.62202146 | -3.01846721 | -0.16995966 |
| As                                                                                         | -3.73089395 | -1.59624308 | 2.65448208  |
| As                                                                                         | -2.67735125 | -1.57341061 | -3.32916148 |

|    |             |             |             |
|----|-------------|-------------|-------------|
| O  | 2.69161959  | 1.48487456  | -1.41472021 |
| O  | 2.92649650  | 1.41785111  | 1.01177751  |
| O  | 4.01191491  | 3.86180112  | -0.26246849 |
| O  | 1.37256665  | 2.67348336  | -3.66068952 |
| O  | 2.40247302  | 2.47276789  | 3.55323810  |
| O  | -1.46762908 | -3.83828409 | 1.27927716  |
| O  | -1.23910945 | -3.89472589 | -1.17713609 |
| O  | -4.01191491 | -3.86180112 | -0.26246849 |
| O  | -2.40247302 | -2.47276789 | 3.55323810  |
| O  | -1.37256665 | -2.67348336 | -3.66068952 |
| V  | 3.41604963  | 0.00000000  | -0.32132411 |
| As | 2.67735125  | 1.57341061  | -3.32916148 |
| As | 3.73089395  | 1.59624308  | 2.65448208  |
| V  | -0.00000000 | -4.59002779 | 0.13560102  |
| As | -1.64440388 | -4.08340158 | 3.08229447  |
| V  | -0.00000000 | -3.70064783 | -2.72403946 |
| O  | 2.69161959  | -1.48487456 | -1.41472021 |
| O  | 2.92649650  | -1.41785111 | 1.01177751  |
| O  | 5.03308490  | 0.00000000  | -0.45709594 |
| O  | 1.72809201  | -0.00000000 | -3.53057017 |
| O  | 3.18813738  | 0.00000000  | 3.38169537  |
| O  | 1.46762908  | -3.83828409 | 1.27927716  |
| O  | 1.23910945  | -3.89472589 | -1.17713609 |
| O  | -0.00000000 | -6.22596304 | 0.20805696  |
| O  | -0.00000000 | -3.49004118 | 3.63981276  |
| O  | 0.00000000  | 5.15697078  | -3.46600416 |
| V  | 2.62202146  | -3.01846721 | -0.16995966 |
| As | 2.67735125  | -1.57341061 | -3.32916148 |
| As | 3.73089395  | -1.59624308 | 2.65448208  |
| As | 1.64440388  | -4.08340158 | 3.08229447  |
| O  | -0.00000000 | -5.15697078 | -3.46600416 |
| O  | 4.01191491  | -3.86180112 | -0.26246849 |

**[V<sub>8</sub>As<sub>16</sub>O<sub>40</sub>]**

64

|    |             |             |             |
|----|-------------|-------------|-------------|
| V  | 1.57794599  | -3.80949862 | 0.00000000  |
| O  | 0.00000000  | -3.74890923 | -1.22890876 |
| O  | 2.65087914  | -2.65087914 | 1.22890876  |
| O  | 0.00000000  | -3.74890923 | 1.22890876  |
| O  | 2.65087914  | -2.65087914 | -1.22890876 |
| O  | 2.19508796  | -5.29941112 | 0.00000000  |
| V  | -1.57794599 | -3.80949862 | 0.00000000  |
| As | 0.00000000  | -4.23702509 | -3.02149281 |
| V  | 3.80949862  | -1.57794599 | 0.00000000  |
| As | 2.99602917  | -2.99602917 | 3.02149281  |
| As | -0.00000000 | -4.23702509 | 3.02149281  |
| As | 2.99602917  | -2.99602917 | -3.02149281 |
| O  | -2.65087914 | -2.65087914 | -1.22890876 |
| O  | -2.65087914 | -2.65087914 | 1.22890876  |
| O  | -2.19508796 | -5.29941112 | 0.00000000  |
| O  | -1.27535626 | -3.07898238 | -3.60355928 |
| O  | 1.27535626  | -3.07898238 | -3.60355928 |
| O  | 3.74890923  | 0.00000000  | 1.22890876  |
| O  | 3.74890923  | 0.00000000  | -1.22890876 |
| O  | 5.29941112  | -2.19508796 | 0.00000000  |
| O  | 3.07898238  | -1.27535626 | 3.60355928  |

|    |             |             |             |
|----|-------------|-------------|-------------|
| O  | 1.27535626  | -3.07898238 | 3.60355928  |
| O  | -1.27535626 | -3.07898238 | 3.60355928  |
| O  | 3.07898238  | -1.27535626 | -3.60355928 |
| V  | -3.80949862 | -1.57794599 | -0.00000000 |
| As | -2.99602917 | -2.99602917 | -3.02149281 |
| As | -2.99602917 | -2.99602917 | 3.02149281  |
| V  | 3.80949862  | 1.57794599  | 0.00000000  |
| As | 4.23702509  | -0.00000000 | 3.02149281  |
| As | 4.23702509  | -0.00000000 | -3.02149281 |
| O  | -3.74890923 | -0.00000000 | -1.22890876 |
| O  | -3.74890923 | -0.00000000 | 1.22890876  |
| O  | -5.29941112 | -2.19508796 | 0.00000000  |
| O  | -3.07898238 | -1.27535626 | -3.60355928 |
| O  | -3.07898238 | -1.27535626 | 3.60355928  |
| O  | 2.65087914  | 2.65087914  | 1.22890876  |
| O  | 2.65087914  | 2.65087914  | -1.22890876 |
| O  | 5.29941112  | 2.19508796  | 0.00000000  |
| O  | 3.07898238  | 1.27535626  | 3.60355928  |
| O  | 3.07898238  | 1.27535626  | -3.60355928 |
| V  | -3.80949862 | 1.57794599  | 0.00000000  |
| As | -4.23702509 | 0.00000000  | -3.02149281 |
| As | -4.23702509 | 0.00000000  | 3.02149281  |
| V  | 1.57794599  | 3.80949862  | 0.00000000  |
| As | 2.99602917  | 2.99602917  | 3.02149281  |
| As | 2.99602917  | 2.99602917  | -3.02149281 |
| O  | -2.65087914 | 2.65087914  | -1.22890876 |
| O  | -2.65087914 | 2.65087914  | 1.22890876  |
| O  | -5.29941112 | 2.19508796  | 0.00000000  |
| O  | -3.07898238 | 1.27535626  | -3.60355928 |
| O  | -3.07898238 | 1.27535626  | 3.60355928  |
| O  | -0.00000000 | 3.74890923  | 1.22890876  |
| O  | -0.00000000 | 3.74890923  | -1.22890876 |
| O  | 2.19508796  | 5.29941112  | 0.00000000  |
| O  | 1.27535626  | 3.07898238  | 3.60355928  |
| O  | 1.27535626  | 3.07898238  | -3.60355928 |
| V  | -1.57794599 | 3.80949862  | 0.00000000  |
| As | -2.99602917 | 2.99602917  | -3.02149281 |
| As | -2.99602917 | 2.99602917  | 3.02149281  |
| As | 0.00000000  | 4.23702509  | 3.02149281  |
| As | 0.00000000  | 4.23702509  | -3.02149281 |
| O  | -2.19508796 | 5.29941112  | 0.00000000  |
| O  | -1.27535626 | 3.07898238  | -3.60355928 |
| O  | -1.27535626 | 3.07898238  | 3.60355928  |

## References:

- 1 M. Rasmussen, C. Näther and W. Bensch, *Zeitschrift für Anorg. und Allg. Chemie*, 2021, **647**, 992–997.
- 2 A. Wutkowski, N. Evers and W. Bensch, *Zeitschrift für Anorg. und Allg. Chemie*, 2011, **637**, 2205–2210.
- 3 R. Basler, G. Chaboussant, A. Sieber, H. Andres, M. Murrie, P. Kögerler, H. Bögge, D. C. Crans, E. Krickemeyer, S. Janssen, H. Mutka, A. Müller and H.-U. Güdel, *Inorg. Chem.*, 2002, **41**, 5675–5685.
- 4 A. Müller, J. Döring and H. Bögge, *J. Chem. Soc. Chem. Commun.*, 1991, 273–274.
